# Supplementary material
Source: Royal Society of Chemistry journal article supplement (doi:10.1039/d5bm01540e)
Supplement: d5bm01540e1.pdf [file d5bm01540e1.pdf]

## Supplementary materials

# Plasmonic fluorescent Ag/C-based nanohybrids for treatment of chemically-induced cutaneous burns

Halyna Kuznietsova,<sup>\*a</sup> Iryna Byelinska,<sup>a,b</sup> Arsen Ishchuk,<sup>a</sup> Vladimir Lysenko,<sup>c</sup> Alexander Zaderko,<sup>c</sup> Yury V. Ryabchikov,<sup>e</sup> Olga Pylypova,<sup>a</sup> Kostiantyn Paliienko,<sup>d</sup> and Nataliia Dziubenko<sup>a</sup>

### Physicochemical characterization of Ag/C NHs

Size and Z-potential distributions of colloidal Ag/C NHs was additionally determined using a Zetasizer Nano ZS (Malvern Instruments) equipped with a 5 mW He–Ne laser ( $\lambda = 633$  nm) and a 173° Non-Invasive Back Scatter (NIBS) detector with a narrow-band optical filter.

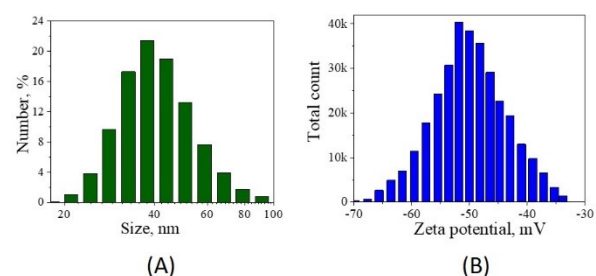

**Fig. 1S** (A) Size and (B) Z-potential distributions of Ag/C NHs at pH 9.3

Figure 1S shows characteristic size and Z-potential distributions of Ag/C NHs at pH 9.3. As one can see, hydrodynamic diameters of the NHs correspond to the range of 20–100 nm, with a clearly pronounced maximum at around 37 nm. This observation is in good agreement with the TEM pictures. As for the Z-potentials, the most probable values are strongly negative and are in the range -45–55 mV. This indicates on reliable colloidal stability of the solutions with dispersed Ag/C NHs.

FTIR spectrum of carbon phase of the Ag/C NHs are shown in Figure 2S. Broad absorption features in the range 3000–3400  $\text{cm}^{-1}$  can be assigned to stretching vibrations of O–H and N–H groups indicating presence of hydroxyl and amine functionalities. The bands observed in the 2800–2915  $\text{cm}^{-1}$  region can be related to  $\nu(\text{C–H})$  of  $\text{sp}^3$ -hybridized alkane bonds. An absorption band near 1640  $\text{cm}^{-1}$  corresponds to C–O–C stretching and conjugated carbonyl (C=O) vibrations, while the band around 1600  $\text{cm}^{-1}$  can be

associated with aromatic C=C vibrations. The band at 1544  $\text{cm}^{-1}$  could be related to  $\nu(\text{C}=\text{N})$  stretches in conjugated systems or indicates the presence of amide groups. An absorption band centered at 1400  $\text{cm}^{-1}$  is characteristic for C–O vibrations of carboxylic acid. The peak near 1090  $\text{cm}^{-1}$  is indicative of C–N single-bond stretching vibration. In the 700–760  $\text{cm}^{-1}$  region, aromatic C–H bending vibrations are also observed.

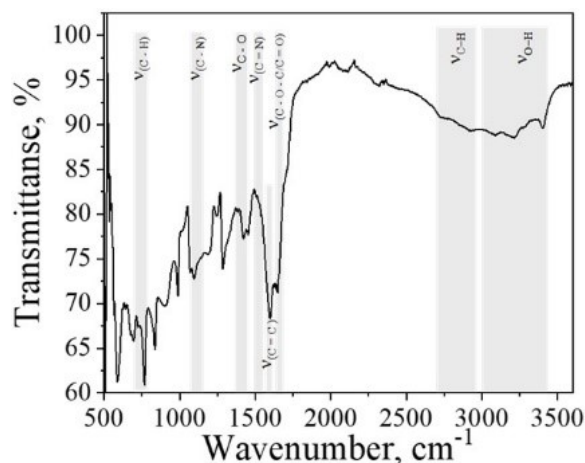

**Fig. 2S** FTIR spectrum of C phase of Ag/C NHs.

### Optical properties of Ag/C NHs

To study changes in optical properties of the formed Ag/C NHs, they were investigated by UV-Vis and PL spectroscopy. One can see considerable differences of absorbance spectra of CDs and Ag/C NHs solutions. Indeed, a smaller amount of Ag (10  $\mu\text{g/L}$ ) led to broadening of the spectrum due to appearance of additional peak at around 400 nm. It is associated with plasmonic absorption of silver nanostructures in Ag/C NHs. Moreover, higher intensity of this peak can point to stronger absorption due to larger silver content. Furthermore, increasing of absorption of Ag/C NHs also led to a weaker photoluminescence excitation (PLE) efficiency (Figure 3S).

<sup>a</sup> Institute of High Technologies, Taras Shevchenko National University of Kyiv, Volodymyrska str. 64/13, 01601 Kyiv, Ukraine.

<sup>b</sup> Educational and scientific center "Institute of Biology and Medicine", Taras Shevchenko National University of Kyiv, Volodymyrska str. 64/13, 01601 Kyiv, Ukraine.

<sup>c</sup> Université Claude Bernard Lyon 1, CNRS, Institut Lumière Matière, UMR5306, 69100 Villeurbanne, France.

<sup>d</sup> Université Claude Bernard Lyon 1, CNRS, Ingénierie des Matériaux Polymères, UMR5223, 69100 Villeurbanne, France

<sup>e</sup> HiLASE Centre, Institute of Physics of the Czech Academy of Sciences, Za Radnicí 828, 252 41 Dolní Břežany, Czech Republic.

† Footnotes relating to the title and/or authors should appear here.

Supplementary Information available: [details of any supplementary information available should be included here]. See DOI: 10.1039/x0xx00000x

As a result, PL intensity of Ag/C NHs decreased with increasing of Ag content as compared to bare CDs (Figure 3S). This tendency was found for different excitation wavelength: 370 nm and 400 nm. These wavelengths were chosen based on aforementioned absorbance study (Figure 6): the first excitation wavelength is associated with absorption maximum of CDs while the second one is related

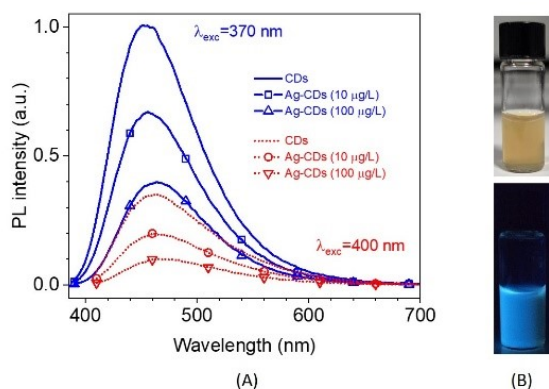

to plasmonic maximum of Ag nanoparticles.

**Fig. 3S** PL spectra of CDs with different amount of plasmonic (Ag) metal excited at 370 nm and 400 nm (A); Photos of colloidal Ag/C NHs in daylight and under the UV-light illumination (B).

The obtained results demonstrate remarkable influence of plasmonic metallic content on optical properties of the Ag/C NHs.
