# Supplementary material
Source: Royal Society of Chemistry journal article supplement (doi:10.1039/d5bm01540e)
Supplement: d5bm01540e2.xlsx [file d5bm01540e2.xlsx]

## Sheet: Design
Animals		young male Wistar rats
Burn induction		10N HCl, 3N NaOH, soaked gause disc 2.5 cm diameter
Term of gause application		30 min
Vehicle		cellulose gel
Cmpd		Ag195, Ag197. Solution:gel = 3:1
Treatment start		17.01.2024, in 2 hour after disc removal
Treatment duration		till 30.01.2024

## Sheet: BWt
Group	Rat#	BWt, g at digfferent days of the study														ΔBWt, % 7th day	ΔBWt, % 14th day	Group	Rat#	Relative BWt compared to initial value, %
		1	2	3	4	5	6	7	8	9	10	11	12	13	14					2	3	4	5	6	7	8	9	10	11	12	13	14
Control	1	146	151	156	161	162	163	164	168	172	176	178	180	182	195	-	33.5616	Control	1	3.42466	6.84932	10.274	10.9589	11.6438	12.3288	15.0685	17.8082	20.5479	21.9178	23.2877	24.6575	33.5616
	2	134	136	138	141	141	141	142	-	-	-	-	-	-	-	5.97015	-		2	1.49254	2.98507	5.22388	5.22388	5.22388	5.97015	-	-	-	-	-	-	-
	3	138	143	148	153	154	155	157	159	161	163	164	165	165	170	-	23.1884		3	3.62319	7.24638	10.8696	11.5942	12.3188	13.7681	15.2174	16.6667	18.1159	18.8406	19.5652	19.5652	23.1884
	4	143	148	153	158	160	162	163	166	169	172	174	182	190	206	-	44.0559		4	3.4965	6.99301	10.4895	11.8881	13.2867	13.986	16.0839	18.1818	20.2797	21.6783	27.2727	32.8671	44.0559
	5	135	138	141	145	146	147	147	-	-	-	-	-	-	-	8.88889	-		5	2.22222	4.44444	7.40741	8.14815	8.88889	8.88889	-	-	-	-	-	-	-
	6	147	152	157	161	161	161	162	-	-	-	-	-	-	-	10.2041	-		6	3.40136	6.80272	9.52381	9.52381	9.52381	10.2041	-	-	-	-	-	-	-
	7	151	157	163	169	170	171	172	-	-	-	-	-	-	-	13.9073	-		7	3.97351	7.94702	11.9205	12.5828	13.245	13.9073	-	-	-	-	-	-	-
	8	131	136	141	146	146	146	146	149	152	155	157	169	180	201	-	53.4351		8	3.81679	7.63359	11.4504	11.4504	11.4504	11.4504	13.7405	16.0305	18.3206	19.8473	29.0076	37.4046	53.4351
	9	138	139	140	142	142	142	143	-	-	-	-	-	-	-	3.62319	-		9	0.724638	1.44928	2.89855	2.89855	2.89855	3.62319	-	-	-	-	-	-	-
	10	129	134	139	143	145	147	148	151	154	157	161	166	170	176	-	36.4341		10	3.87597	7.75194	10.8527	12.4031	13.9535	14.7287	17.0543	19.3798	21.7054	24.8062	28.6822	31.7829	36.4341
Mean		139.2	143.4	147.6	151.9	152.7	153.5	154.4	158.6	161.6	164.6	166.8	172.4	177.4	189.6	8.51872	38.135	Mean		3.00514	6.01028	9.09103	9.66719	10.2433	10.8856	15.4329	17.6134	19.7939	21.418	25.5631	29.2555	38.135
SD		6.92532	7.64461	8.58138	9.35361	9.53992	9.78008	9.95188	7.65768	7.91454	8.21219	7.93473	7.17217	8.89044	14.1223	3.53484	10.1623	SD		1.06831	2.13662	2.81989	3.12035	3.48219	3.54371	1.1042	1.1733	1.37438	2.04488	3.62404	6.33849	10.1623
SEM		0.692532	0.764461	0.858138	0.935361	0.953992	0.978008	0.995188	1.53154	1.58291	1.64244	1.58695	1.43443	1.77809	2.82446	0.706968	2.03246	SEM		0.106831	0.213662	0.281989	0.312035	0.348219	0.354371	0.220839	0.23466	0.274877	0.408975	0.724808	1.2677	2.03246
Acidic burn	11	178	179	180	181	182	183	183	186	189	192	195	202	208	224	-	25.8427	Acidic burn	11	0.561798	1.1236	1.68539	2.24719	2.80899	2.80899	4.49438	6.17978	7.86517	9.55056	13.4831	16.8539	25.8427
	12	150	153	156	159	162	165	169	173	177	181	186	190	194	201	-	34		12	2	4	6	8	10	12.6667	15.3333	18	20.6667	24	26.6667	29.3333	34
	13	125	131	137	143	142	141	141	145	149	153	156	160	163	173	-	38.4		13	4.8	9.6	14.4	13.6	12.8	12.8	16	19.2	22.4	24.8	28	30.4	38.4
	14	144	149	154	160	157	154	151	155	159	163	165	173	180	187	-	29.8611		14	3.47222	6.94444	11.1111	9.02778	6.94444	4.86111	7.63889	10.4167	13.1944	14.5833	20.1389	25	29.8611
	15	174	170	166	163	171	179	187	-	-	-	-	-	-	-	7.47126	-		15	-2.29885	-4.5977	-6.32184	-1.72414	2.87356	7.47126	-	-	-	-	-	-	-
	16	130	131	132	132	133	134	134	-	-	-	-	-	-	-	3.07692	-		16	0.769231	1.53846	1.53846	2.30769	3.07692	3.07692	-	-	-	-	-	-	-
	17	173	175	177	179	179	179	179	-	-	-	-	-	-	-	3.46821	-		17	1.15607	2.31214	3.46821	3.46821	3.46821	3.46821	-	-	-	-	-	-	-
	18	155	161	167	172	171	170	168	-	-	-	-	-	-	-	8.3871	-		18	3.87097	7.74194	10.9677	10.3226	9.67742	8.3871	-	-	-	-	-	-	-
	19	121	122	123	125	127	129	130	135	140	145	148	152	155	161	-	33.0579		19	0.826446	1.65289	3.30579	4.95868	6.61157	7.43802	11.5702	15.7025	19.8347	22.314	25.6198	28.0992	33.0579
	20	129	132	135	138	136	134	131	-	-	-	-	-	-	-	1.55039	-		20	2.32558	4.65116	6.97674	5.42636	3.87597	1.55039	-	-	-	-	-	-	-
Mean		147.9	150.3	152.7	155.2	156	156.8	157.3	158.8	162.8	166.8	170	175.4	180	189.2	4.79078	32.2323	Mean		1.74835	3.49669	5.31316	5.76343	6.21371	6.45287	11.0074	13.8998	16.7922	19.0496	22.7817	25.9373	32.2323
SD		20.5254	19.5604	18.9739	18.7286	19.1259	19.959	21.331	18.5084	17.96	17.4172	17.8101	18.4997	19.4628	21.9672	2.65726	4.20229	SD		1.927	3.85401	5.67112	4.29249	3.40581	3.80522	4.42092	4.89662	5.44705	5.97343	5.36332	4.88894	4.20229
SEM		2.05254	1.95604	1.89739	1.87286	1.91259	1.9959	2.1331	3.70168	3.59199	3.48345	3.56202	3.69995	3.89256	4.39345	0.531452	0.840459	SEM		0.1927	0.385401	0.567112	0.429249	0.340581	0.380522	0.884185	0.979324	1.08941	1.19469	1.07266	0.977787	0.840459
p (T-test) compared to Control		0.243858	0.337365	0.471974	0.641965	0.648773	0.661329	0.715985	0.984556	0.90569	0.824992	0.751154	0.770061	0.814103	0.976312	0.130282	0.314347	p (T-test) compared to Control		0.104218	0.104218	0.0903792	0.0405515	0.0231631	0.0197896	0.0880174	0.178431	0.316406	0.474586	0.415135	0.431119	0.314347
Acidic burn+Gel	21	131	134	137	140	141	142	142	145	148	151	152	155	157	169	-	29.0076	Acidic burn+Gel	21	2.29008	4.58015	6.87023	7.63359	8.39695	8.39695	10.687	12.9771	15.2672	16.0305	18.3206	19.8473	29.0076
	22	181	183	185	187	187	187	187	190	193	196	197	199	201	208	-	14.9171		22	1.10497	2.20994	3.31492	3.31492	3.31492	3.31492	4.97238	6.62983	8.28729	8.83978	9.94475	11.0497	14.9171
	23	173	177	181	184	185	186	186	186	186	186	185	184	182	180	-	4.04624		23	2.31214	4.62428	6.35838	6.93642	7.51445	7.51445	7.51445	7.51445	7.51445	6.93642	6.35838	5.20231	4.04624
	24	158	160	162	164	164	164	164	168	172	176	178	182	185	196	-	24.0506		24	1.26582	2.53165	3.79747	3.79747	3.79747	3.79747	6.32911	8.86076	11.3924	12.6582	15.1899	17.0886	24.0506
	25	185	183	181	179	179	179	179	-	-	-	-	-	-	-	-3.24324	-		25	-1.08108	-2.16216	-3.24324	-3.24324	-3.24324	-3.24324	-	-	-	-	-	-	-
	26	157	160	163	166	166	166	166	-	-	-	-	-	-	-	5.73248	-		26	1.91083	3.82166	5.73248	5.73248	5.73248	5.73248	-	-	-	-	-	-	-
	27	135	137	139	141	142	143	143	-	-	-	-	-	-	-	5.92593	-		27	1.48148	2.96296	4.44444	5.18519	5.92593	5.92593	-	-	-	-	-	-	-
	28	164	167	170	173	172	171	170	173	176	179	181	184	186	191	-	16.4634		28	1.82927	3.65854	5.4878	4.87805	4.26829	3.65854	5.4878	7.31707	9.14634	10.3659	12.1951	13.4146	16.4634
	29	172	171	170	170	170	170	170	-	-	-	-	-	-	-	-1.16279	-		29	-0.581395	-1.16279	-1.16279	-1.16279	-1.16279	-1.16279	-	-	-	-	-	-	-
	30	175	175	175	176	177	178	178	-	-	-	-	-	-	-	1.71429	-		30	0	0	0.571429	1.14286	1.71429	1.71429	-	-	-	-	-	-	-
Mean		163.1	164.7	166.3	168	168.3	168.6	168.5	172.4	175	177.6	178.6	180.8	182.2	188.8	1.79333	17.697	Mean		1.05321	2.10642	3.21711	3.42149	3.62587	3.5649	6.99815	8.65984	10.3215	10.9662	12.4017	13.3205	17.697
SD		17.3289	16.5109	15.8685	15.3753	15.1529	14.9546	14.9416	15.9072	15.3883	14.9746	14.7865	14.2745	14.2183	13.3776	3.6526	8.53102	SD		1.14106	2.28212	3.23215	3.33839	3.49172	3.48529	2.03504	2.27662	2.79303	3.15061	4.133	5.05704	8.53102
SEM		1.73289	1.65109	1.58685	1.53753	1.51529	1.49546	1.49416	3.18145	3.07766	2.99493	2.9573	2.85489	2.84366	2.67552	0.730519	1.7062	SEM		0.114106	0.228212	0.323215	0.333839	0.349172	0.348529	0.407007	0.455324	0.558606	0.630122	0.8266	1.01141	1.7062
p (T-test) compared to Control		0.00119383	0.00248952	0.00604934	0.0151645	0.0175863	0.0207326	0.0299972	0.156599	0.160035	0.166415	0.197253	0.323689	0.582721	0.936467	0.0294268	0.0151007	p (T-test) compared to Control		0.00147828	0.00147828	0.000659996	0.000671682	0.000792956	0.000331594	8.50241e-05	0.000113568	0.000293987	0.000531316	0.0013753	0.00435446	0.0151007
p (T-test) compared to Burn		0.106814	0.108724	0.11639	0.130441	0.147834	0.172866	0.213326	0.297412	0.332401	0.374548	0.478708	0.65625	0.859693	0.975948	0.221065	0.0156563	p (T-test) compared to Burn		0.364076	0.364076	0.348147	0.212693	0.128874	0.110425	0.138055	0.0882477	0.0674397	0.0435905	0.0154416	0.007111	0.0156563
Acidic burn+Ag195	31	192	195	198	202	196	190	184	187	190	193	195	200	204	221	-	15.1042	Acidic burn+Ag195	31	1.5625	3.125	5.20833	2.08333	-1.04167	-4.16667	-2.60417	-1.04167	0.520833	1.5625	4.16667	6.25	15.1042
	32	165	167	169	171	169	167	165	168	171	174	176	180	183	197	-	19.3939		32	1.21212	2.42424	3.63636	2.42424	1.21212	0	1.81818	3.63636	5.45455	6.66667	9.09091	10.9091	19.3939
	33	172	174	176	178	174	170	165	167	169	171	172	179	185	197	-	14.5349		33	1.16279	2.32558	3.48837	1.16279	-1.16279	-4.06977	-2.90698	-1.74419	-0.581395	0	4.06977	7.55814	14.5349
	34	174	174	174	175	172	169	166	168	170	172	174	177	180	186	-	6.89655		34	0	0	0.574713	-1.14943	-2.87356	-4.5977	-3.44828	-2.29885	-1.14943	0	1.72414	3.44828	6.89655
	35	165	171	177	184	181	178	174	-	-	-	-	-	-	-	5.45455	-		35	3.63636	7.27273	11.5152	9.69697	7.87879	5.45455	-	-	-	-	-	-	-
	36	176	178	180	181	179	177	176	177	178	179	179	181	183	185	-	5.11364		36	1.13636	2.27273	2.84091	1.70455	0.568182	0	0.568182	1.13636	1.70455	1.70455	2.84091	3.97727	5.11364
	37	185	191	197	203	196	189	182	-	-	-	-	-	-	-	-1.62162	-		37	3.24324	6.48649	9.72973	5.94595	2.16216	-1.62162	-	-	-	-	-	-	-
	38	174	175	176	176	173	170	168	-	-	-	-	-	-	-	-3.44828	-		38	0.574713	1.14943	1.14943	-0.574713	-2.29885	-3.44828	-	-	-	-	-	-	-
	39	163	168	173	179	175	171	167	-	-	-	-	-	-	-	2.45399	-		39	3.06748	6.13497	9.81595	7.36196	4.90798	2.45399	-	-	-	-	-	-	-
	40	161	164	167	169	167	165	163	-	-	-	-	-	-	-	1.24224	-		40	1.86335	3.72671	4.96894	3.72671	2.48447	1.24224	-	-	-	-	-	-	-
Mean		172.7	175.7	178.7	181.8	178.2	174.6	171	173.4	175.6	177.8	179.2	183.4	187	197.2	0.816174	12.2086	Mean		1.74589	3.49179	5.29279	3.23824	1.18368	-0.875326	-1.31461	-0.0623952	1.18982	1.98674	4.37848	6.42856	12.2086
SD		9.42391	9.55039	10.0603	11.1606	9.7242	8.35703	7.14143	7.70973	7.86384	8.08455	8.23165	8.40476	8.6487	12.9677	3.1147	5.36622	SD		1.14132	2.28265	3.61129	3.29753	3.17445	3.15022	2.10287	2.18664	2.34562	2.45176	2.52019	2.69347	5.36622
SEM		0.942391	0.955039	1.00603	1.11606	0.97242	0.835703	0.714143	1.54195	1.57277	1.61691	1.64633	1.68095	1.72974	2.59353	0.62294	1.07324	SEM		0.114132	0.228265	0.361129	0.329753	0.317445	0.315022	0.420575	0.437328	0.469124	0.490352	0.504038	0.538694	1.07324
p (T-test) compared to Control		8.71548e-08	2.82145e-07	1.39634e-06	8.13629e-06	2.49897e-05	0.000110282	0.000725684	0.0260877	0.0363924	0.0511934	0.0619048	0.0816296	0.160216	0.450771	0.0113595	0.0019705	p (T-test) compared to Control		0.026512	0.026512	0.0229217	0.000483435	1.81853e-05	6.76454e-07	6.21184e-07	5.74436e-07	7.8249e-07	1.92248e-06	1.15171e-05	0.000164358	0.0019705
p (T-test) compared to Burn		0.00403292	0.00255306	0.00190669	0.00179034	0.00612513	0.0238448	0.084314	0.183389	0.227944	0.28503	0.375792	0.453729	0.529415	0.547991	0.0881308	0.000371828	p (T-test) compared to Burn		0.997414	0.997414	0.992847	0.178646	0.00453324	0.000309101	0.00100922	0.000815237	0.000762988	0.000741655	0.000256314	0.000113755	0.000371828
Acidic burn+Ag197	41	157	161	165	170	168	166	165	168	171	174	175	179	182	198	-	26.1146	Acidic burn+Ag197	41	2.54777	5.09554	8.28025	7.00637	5.73248	5.09554	7.00637	8.9172	10.828	11.465	14.0127	15.9236	26.1146
	42	164	168	172	175	173	171	169	-	-	-	-	-	-	-	3.04878	-		42	2.43902	4.87805	6.70732	5.4878	4.26829	3.04878	-	-	-	-	-	-	-
	43	183	185	187	189	186	183	179	182	185	188	192	197	201	226	-	23.4973		43	1.0929	2.18579	3.27869	1.63934	0	-2.18579	-0.546448	1.0929	2.73224	4.91803	7.65027	9.83607	23.4973
	44	157	159	161	162	162	162	161	167	173	179	186	197	208	223	-	42.0382		44	1.27389	2.54777	3.18471	3.18471	3.18471	2.54777	6.36943	10.1911	14.0127	18.4713	25.4777	32.4841	42.0382
	45	178	179	180	182	182	182	182	-	-	-	-	-	-	-	2.24719	-		45	0.561798	1.1236	2.24719	2.24719	2.24719	2.24719	-	-	-	-	-	-	-
	46	168	170	172	173	171	169	167	-	-	-	-	-	-	-	-0.595238	-		46	1.19048	2.38095	2.97619	1.78571	0.595238	-0.595238	-	-	-	-	-	-	-
	47	156	156	156	156	155	154	154	-	-	-	-	-	-	-	-1.28205	-		47	0	0	0	-0.641026	-1.28205	-1.28205	-	-	-	-	-	-	-
	48	183	178	173	167	166	165	165	-	-	-	-	-	-	-	-9.83607	-		48	-2.73224	-5.46448	-8.74317	-9.28962	-9.83607	-9.83607	-	-	-	-	-	-	-
	49	177	182	187	192	189	186	182	183	184	185	185	188	190	196	-	10.7345		49	2.82486	5.64972	8.47458	6.77966	5.08475	2.82486	3.38983	3.9548	4.51977	4.51977	6.21469	7.34463	10.7345
	50	155	156	157	158	156	154	151	152	153	154	155	157	159	169	-	9.03226		50	0.645161	1.29032	1.93548	0.645161	-0.645161	-2.58065	-1.93548	-1.29032	-0.645161	0	1.29032	2.58065	9.03226
Mean		167.8	169.4	171	172.4	170.8	169.2	167.5	170.4	173.2	176	178.6	183.6	188	202.4	-1.28348	22.2834	Mean		0.984363	1.96873	2.83412	1.88453	0.934939	-0.071565	2.85674	4.57313	6.28952	7.87482	10.9291	13.6338	22.2834
SD		10.9618	10.5281	10.7517	11.7405	11.2677	10.8701	10.3175	11.3947	11.5655	12.0167	13.0015	14.8809	17.0294	20.7711	4.5794	11.9614	SD		1.52189	3.04378	4.69079	4.448	4.27256	4.06095	3.58858	4.4115	5.36884	6.43719	8.3313	10.3607	11.9614
SEM		1.09618	1.05281	1.07517	1.17405	1.12677	1.08701	1.03175	2.27895	2.31309	2.40333	2.60031	2.97617	3.40588	4.15423	0.91588	2.39228	SEM		0.152189	0.304378	0.469079	0.4448	0.427256	0.406095	0.717717	0.8823	1.07377	1.28744	1.66626	2.07215	2.39228
p (T-test) compared to Control		3.2645e-06	1.13852e-05	7.43195e-05	0.000676728	0.00172127	0.00473725	0.0134117	0.123931	0.136426	0.155865	0.159876	0.212128	0.301866	0.33793	0.00951625	0.0780699	p (T-test) compared to Control		0.00434535	0.00434535	0.0029889	0.000433819	8.04317e-05	9.20954e-06	0.000152859	0.000447455	0.00123447	0.00389329	0.0122131	0.0330066	0.0780699
p (T-test) compared to Burn		0.0194527	0.0188962	0.0215162	0.0313618	0.0608025	0.119033	0.212902	0.316934	0.35872	0.409875	0.457836	0.509258	0.553326	0.407981	0.0509025	0.155178	p (T-test) compared to Burn		0.36297	0.36297	0.325639	0.0760323	0.00957957	0.00246139	0.0210591	0.0221428	0.0251968	0.0344419	0.0436896	0.0639841	0.155178
Alkali burn	51	168	172	176	181	178	175	172	176	180	184	186	191	195	211	-	25.5952	Alkali burn	51	2.38095	4.7619	7.7381	5.95238	4.16667	2.38095	4.7619	7.14286	9.52381	10.7143	13.6905	16.0714	25.5952
	52	140	144	148	151	149	147	145	150	155	160	164	174	184	194	-	38.5714		52	2.85714	5.71429	7.85714	6.42857	5	3.57143	7.14286	10.7143	14.2857	17.1429	24.2857	31.4286	38.5714
	53	146	150	154	159	157	155	152	157	162	167	173	183	192	207	-	41.7808		53	2.73973	5.47945	8.90411	7.53425	6.16438	4.10959	7.53425	10.9589	14.3836	18.4932	25.3425	31.5068	41.7808
	54	157	160	163	165	162	159	156	160	164	168	170	176	182	194	-	23.5669		54	1.91083	3.82166	5.09554	3.18471	1.27389	-0.636943	1.91083	4.4586	7.00637	8.28025	12.1019	15.9236	23.5669
	55	206	210	214	217	211	205	200	-	-	-	-	-	-	-	-2.91262	-		55	1.94175	3.8835	5.33981	2.42718	-0.485437	-2.91262	-	-	-	-	-	-	-
	56	158	160	162	165	163	161	160	-	-	-	-	-	-	-	1.26582	-		56	1.26582	2.53165	4.43038	3.16456	1.89873	1.26582	-	-	-	-	-	-	-
	57	155	158	161	165	161	157	154	-	-	-	-	-	-	-	-0.645161	-		57	1.93548	3.87097	6.45161	3.87097	1.29032	-0.645161	-	-	-	-	-	-	-
	58	163	166	169	172	167	162	158	-	-	-	-	-	-	-	-3.06748	-		58	1.84049	3.68098	5.52147	2.45399	-0.613497	-3.06748	-	-	-	-	-	-	-
	59	156	160	164	169	167	165	163	-	-	-	-	-	-	-	4.48718	-		59	2.5641	5.12821	8.33333	7.05128	5.76923	4.48718	-	-	-	-	-	-	-
	60	161	165	169	172	169	166	162	171	180	189	196	202	208	196	-	21.7391		60	2.48447	4.96894	6.8323	4.96894	3.10559	0.621118	6.21118	11.8012	17.3913	21.7391	25.4658	29.1925	21.7391
Mean		161	164.5	168	171.6	168.4	165.2	162.2	162.8	168.2	173.6	177.8	185.2	192.2	200.4	-0.174453	30.2507	Mean		2.19208	4.38415	6.65038	4.70368	2.75699	0.917388	5.5122	9.01518	12.5182	15.2739	20.1773	24.8246	30.2507
SD		16.8226	16.9189	17.0411	16.9423	15.9449	14.9987	14.3304	9.45304	10.0876	11.0018	11.6	10.3034	9.26067	7.17217	2.82468	8.25799	SD		0.468078	0.936156	1.44781	1.83688	2.34061	2.60258	2.03809	2.78191	3.73356	5.00713	5.98026	7.25521	8.25799
SEM		1.68226	1.69189	1.70411	1.69423	1.59449	1.49987	1.43304	1.89061	2.01752	2.20036	2.32	2.06068	1.85213	1.43443	0.564935	1.6516	SEM		0.0468078	0.0936156	0.144781	0.183688	0.234061	0.260258	0.407619	0.556383	0.746713	1.00143	1.19605	1.45104	1.6516
p (T-test) compared to Control		0.00207043	0.00312513	0.00488052	0.00683517	0.0207456	0.0656286	0.196535	0.509428	0.333366	0.2262	0.156128	0.0757667	0.0500195	0.209793	0.00493004	0.262921	p (T-test) compared to Control		0.0509522	0.0509522	0.0329623	0.000653911	4.35394e-05	2.2776e-06	2.67529e-05	0.000456652	0.00642389	0.0527272	0.162025	0.384552	0.262921
Alkali burn+gel	61	142	144	146	148	145	142	138	140	142	144	145	152	158	174	-	22.5352	Alkali burn+gel	61	1.40845	2.8169	4.22535	2.11268	0	-2.8169	-1.40845	0	1.40845	2.11268	7.04225	11.2676	22.5352
	62	150	156	162	167	163	159	156	159	162	165	167	176	185	191	-	27.3333		62	4	8	11.3333	8.66667	6	4	6	8	10	11.3333	17.3333	23.3333	27.3333
	63	146	150	154	158	155	152	150	155	160	165	170	178	185	205	-	40.411		63	2.73973	5.47945	8.21918	6.16438	4.10959	2.73973	6.16438	9.58904	13.0137	16.4384	21.9178	26.7123	40.411
	64	155	156	157	157	154	151	148	150	152	154	155	162	168	178	-	14.8387		64	0.645161	1.29032	1.29032	-0.645161	-2.58065	-4.51613	-3.22581	-1.93548	-0.645161	0	4.51613	8.3871	14.8387
	65	146	149	152	154	152	150	148	-	-	-	-	-	-	-	1.36986	-		65	2.05479	4.10959	5.47945	4.10959	2.73973	1.36986	-	-	-	-	-	-	-
	66	187	192	197	202	200	198	196	-	-	-	-	-	-	-	4.81283	-		66	2.6738	5.34759	8.02139	6.95187	5.88235	4.81283	-	-	-	-	-	-	-
	67	180	183	186	188	184	180	176	-	-	-	-	-	-	-	-2.22222	-		67	1.66667	3.33333	4.44444	2.22222	0	-2.22222	-	-	-	-	-	-	-
	68	168	177	186	194	188	182	175	-	-	-	-	-	-	-	4.16667	-		68	5.35714	10.7143	15.4762	11.9048	8.33333	4.16667	-	-	-	-	-	-	-
	69	154	161	168	176	170	164	158	-	-	-	-	-	-	-	2.5974	-		69	4.54545	9.09091	14.2857	10.3896	6.49351	2.5974	-	-	-	-	-	-	-
	70	148	155	162	170	166	162	157	164	171	178	186	192	198	210	-	41.8919		70	4.72973	9.45946	14.8649	12.1622	9.45946	6.08108	10.8108	15.5405	20.2703	25.6757	29.7297	33.7838	41.8919
Mean		157.6	162.3	167	171.4	167.7	164	160.2	153.6	157.4	161.2	164.6	172	178.8	191.6	2.14491	29.402	Mean		2.98209	5.96418	8.76402	6.40388	4.04373	1.62123	3.66819	6.23882	8.80945	11.112	16.1079	20.6968	29.402
SD		14.6847	15.245	16.1493	17.3274	16.9177	16.6072	16.3634	8.21219	9.78979	11.4787	13.9226	13.7986	14.1053	14.2352	2.4933	10.3992	SD		1.51185	3.0237	4.75516	4.19088	3.73136	3.41494	5.21507	6.42791	7.67604	9.43381	9.35271	9.53777	10.3992
SEM		1.46847	1.5245	1.61493	1.73274	1.69177	1.66072	1.63634	1.64244	1.95796	2.29574	2.78453	2.75971	2.82106	2.84703	0.498659	2.07984	SEM		0.151185	0.30237	0.475516	0.419088	0.373136	0.341494	1.04301	1.28558	1.53521	1.88676	1.87054	1.90755	2.07984
p (T-test) compared to Control		0.0031922	0.00377021	0.00515741	0.0081866	0.0324932	0.119541	0.375608	0.399141	0.523386	0.642854	0.790603	0.960234	0.870804	0.846863	0.0185117	0.264016	p (T-test) compared to Control		0.970619	0.970619	0.861135	0.0773021	0.00185577	2.33853e-05	0.00224451	0.00830004	0.0225906	0.0652495	0.0961136	0.173348	0.264016
p (T-test) compared to Burn		0.653294	0.775279	0.899739	0.98052	0.929021	0.873984	0.785809	0.179915	0.162945	0.157432	0.18327	0.163812	0.150887	0.301629	0.253216	0.901446	p (T-test) compared to Burn		0.15159	0.15159	0.218291	0.279644	0.392366	0.628816	0.528603	0.450772	0.410176	0.458196	0.484393	0.510367	0.901446
Alkali burn+Ag195	71	129	135	141	147	144	141	138	146	154	162	170	178	186	193	-	49.6124	Alkali burn+Ag195	71	4.65116	9.30233	13.9535	11.6279	9.30233	6.97674	13.1783	19.3798	25.5814	31.7829	37.9845	44.186	49.6124
	72	136	142	148	154	149	144	140	146	152	158	164	170	176	181	-	33.0882		72	4.41176	8.82353	13.2353	9.55882	5.88235	2.94118	7.35294	11.7647	16.1765	20.5882	25	29.4118	33.0882
	73	153	159	165	170	165	160	154	159	164	169	174	179	184	186	-	21.5686		73	3.92157	7.84314	11.1111	7.84314	4.57516	0.653595	3.92157	7.18954	10.4575	13.7255	16.9935	20.2614	21.5686
	74	159	164	169	173	169	165	162	167	172	177	182	187	192	194	-	22.0126		74	3.14465	6.28931	8.80503	6.28931	3.77358	1.88679	5.03145	8.1761	11.3208	14.4654	17.6101	20.7547	22.0126
	75	129	137	145	152	148	144	139	-	-	-	-	-	-	-	7.75194	-		75	6.20155	12.4031	17.8295	14.7287	11.6279	7.75194	-	-	-	-	-	-	-
	76	137	145	153	160	156	152	148	-	-	-	-	-	-	-	8.0292	-		76	5.83942	11.6788	16.7883	13.8686	10.9489	8.0292	-	-	-	-	-	-	-
	77	138	145	152	158	155	152	149	-	-	-	-	-	-	-	7.97101	-		77	5.07246	10.1449	14.4928	12.3188	10.1449	7.97101	-	-	-	-	-	-	-
	78	145	150	155	161	156	151	145	-	-	-	-	-	-	-	0	-		78	3.44828	6.89655	11.0345	7.58621	4.13793	0	-	-	-	-	-	-	-
	79	177	182	187	193	186	179	172	-	-	-	-	-	-	-	-2.82486	-		79	2.82486	5.64972	9.03955	5.08475	1.12994	-2.82486	-	-	-	-	-	-	-
	80	162	167	172	178	173	168	162	165	168	173	178	183	188	196	-	20.9877		80	3.08642	6.17284	9.87654	6.79012	3.7037	0	1.85185	3.7037	6.79012	9.87654	12.963	16.0494	20.9877
Mean		146.5	152.6	158.7	164.6	160.1	155.6	150.9	156.6	162	167.8	173.6	179.4	185.2	190	4.18546	29.4539	Mean		4.26021	8.52043	12.6166	9.56964	6.52267	3.33856	6.26722	10.0428	14.0653	18.0877	22.1102	26.1327	29.4539
SD		15.0217	14.2492	13.5281	13.2076	12.3649	11.5689	10.8393	9.04655	7.79744	6.9685	6.2482	5.67803	5.3066	5.62139	4.65805	11.0345	SD		1.12048	2.24095	2.9978	3.20011	3.47818	3.82008	3.88501	5.32832	6.48929	7.6601	8.83684	10.0174	11.0345
SEM		1.50217	1.42492	1.35281	1.32076	1.23649	1.15689	1.08393	1.80931	1.55949	1.3937	1.24964	1.13561	1.06132	1.12428	0.93161	2.2069	SEM		0.112048	0.224095	0.29978	0.320011	0.347818	0.382008	0.777002	1.06566	1.29786	1.53202	1.76737	2.00348	2.2069
p (T-test) compared to Control		0.202081	0.105046	0.0522295	0.0301251	0.172266	0.68242	0.48465	0.744437	0.944366	0.568781	0.215013	0.164438	0.170312	0.959316	0.176594	0.280494	p (T-test) compared to Control		0.0256751	0.0256751	0.0192807	0.948518	0.0358796	0.000390067	0.00190238	0.0241034	0.122389	0.425243	0.490254	0.61258	0.280494
p (T-test) compared to Burn		0.0696818	0.123936	0.216011	0.341249	0.233054	0.145775	0.0754406	0.371027	0.359258	0.39907	0.541588	0.352998	0.226017	0.0518648	0.148116	0.910799	p (T-test) compared to Burn		7.33136e-05	7.33136e-05	4.14113e-05	0.000925805	0.014819	0.133507	0.739572	0.741222	0.690247	0.555677	0.726511	0.837776	0.910799
Alkali burn+Ag197	81	190	194	198	203	198	193	188	189	190	191	192	199	205	216	-	13.6842	Alkali burn+Ag197	81	2.10526	4.21053	6.84211	4.21053	1.57895	-1.05263	-0.526316	0	0.526316	1.05263	4.73684	7.89474	13.6842
	82	158	161	164	168	167	166	166	168	170	172	178	180	182	194	-	22.7848		82	1.89873	3.79747	6.32911	5.6962	5.06329	5.06329	6.32911	7.59494	8.86076	12.6582	13.9241	15.1899	22.7848
	83	146	150	154	157	157	157	158	160	162	164	168	172	176	198	-	35.6164		83	2.73973	5.47945	7.53425	7.53425	7.53425	8.21918	9.58904	10.9589	12.3288	15.0685	17.8082	20.5479	35.6164
	84	125	128	131	135	135	135	136	139	142	145	149	152	155	163	-	30.4		84	2.4	4.8	8	8	8	8.8	11.2	13.6	16	19.2	21.6	24	30.4
	85	180	184	188	191	186	181	177	-	-	-	-	-	-	-	-1.66667	-		85	2.22222	4.44444	6.11111	3.33333	0.555556	-1.66667	-	-	-	-	-	-	-
	86	133	137	141	146	143	140	137	-	-	-	-	-	-	-	3.00752	-		86	3.00752	6.01504	9.77444	7.5188	5.26316	3.00752	-	-	-	-	-	-	-
	87	146	149	152	156	153	150	146	-	-	-	-	-	-	-	0	-		87	2.05479	4.10959	6.84932	4.79452	2.73973	0	-	-	-	-	-	-	-
	88	135	140	145	151	150	149	149	-	-	-	-	-	-	-	10.3704	-		88	3.7037	7.40741	11.8519	11.1111	10.3704	10.3704	-	-	-	-	-	-	-
	89	163	166	169	171	173	175	176	-	-	-	-	-	-	-	7.97546	-		89	1.84049	3.68098	4.90798	6.13497	7.36196	7.97546	-	-	-	-	-	-	-
	90	159	162	165	169	166	163	161	164	167	170	175	180	184	194	-	22.0126		90	1.88679	3.77358	6.28931	4.40252	2.51572	1.25786	3.14465	5.03145	6.91824	10.0629	13.2075	15.7233	22.0126
Mean		153.5	157.1	160.7	164.7	162.8	160.9	159.4	164	166.2	168.4	172.4	176.6	180.4	193	3.93734	24.8996	Mean		2.38592	4.77185	7.44895	6.27362	5.0983	4.19744	5.9473	7.43706	8.92682	11.6084	14.2553	16.6712	24.8996
SD		19.6532	19.6543	19.6777	19.4476	18.351	17.4554	16.6985	16.0125	15.3935	14.7865	14.0656	15.1737	16.0325	17.0646	4.59265	7.53256	SD		0.569868	1.13974	1.91513	2.20146	3.0423	4.24397	4.26055	4.72244	5.21939	6.07486	5.62808	5.45637	7.53256
SEM		1.96532	1.96543	1.96777	1.94476	1.8351	1.74554	1.66985	3.2025	3.0787	2.9573	2.81311	3.03473	3.20649	3.41292	0.918531	1.50651	SEM		0.0569868	0.113974	0.191513	0.220146	0.30423	0.424397	0.85211	0.944487	1.04388	1.21497	1.12562	1.09127	1.50651
p (T-test) compared to Control		0.0542881	0.0670652	0.0837558	0.0920618	0.16017	0.281806	0.45034	0.55975	0.609498	0.665114	0.507611	0.630202	0.75185	0.766688	0.15253	0.0697322	p (T-test) compared to Control		0.142364	0.142364	0.165592	0.0157481	0.00366031	0.0019194	0.00257942	0.00306854	0.00380465	0.0155633	0.00966311	0.0168305	0.514051
p (T-test) compared to Burn		0.395894	0.403228	0.411214	0.432698	0.498344	0.582032	0.707124	0.900489	0.833384	0.588027	0.569962	0.375802	0.238207	0.447063	0.165717	0.366359	p (T-test) compared to Burn		0.440623	0.440623	0.331568	0.117803	0.0838826	0.0636189	0.858404	0.580544	0.295503	0.378985	0.187213	0.110173	0.766086
Mean		156.589
SD		18.4402
	CV	11.7762
	Min	121
	Max	206

## Sheet: Burn area
Group	Rat#															Group	Rat#	Relative BWt compared to initial value, %
		18.01	19.01			22.01	23.01			26.01				29.01
		2	3	4	5	6	7	8	9	10	11	12	13	14				3	4	5	6	7	8	9	10	11	12	13
Acidic burn	11	389	333	326.333	319.667	313	289	218.333	147.667	77	62	47	40	32		Acidic burn	11	-14.3959	-16.1097	-17.8235	-19.5373	-25.7069	-43.8732	-62.0394	-80.2057	-84.0617	-87.9177	-89.7172
	12	378	366	365.667	365.333	365	321	265	209	153	122	91	76	60			12	-3.1746	-3.26279	-3.35097	-3.43915	-15.0794	-29.8942	-44.709	-59.5238	-67.7249	-75.9259	-79.8942
	13	333	345	346	347	348	316	254.333	192.667	131	99.6667	68.3333	53	37			13	3.6036	3.9039	4.2042	4.5045	-5.10511	-23.6236	-42.1421	-60.6607	-70.0701	-79.4795	-84.0841
	14	465	423	422	421	420	370	324	278	232	188.333	144.667	123	101			14	-9.03226	-9.24731	-9.46237	-9.67742	-20.4301	-30.3226	-40.2151	-50.1075	-59.4982	-68.8889	-73.5484
	15	188	163	145	127	109	100	-	-	-	-	-	-	-			15	-13.2979	-22.8723	-32.4468	-42.0213	-46.8085	-	-	-	-	-	-
	16	258	251	262	273	284	270	-	-	-	-	-	-	-			16	-2.71318	1.55039	5.81395	10.0775	4.65116	-	-	-	-	-	-
	17	248	233	225	217	209	196	-	-	-	-	-	-	-			17	-6.04839	-9.27419	-12.5	-15.7258	-20.9677	-	-	-	-	-	-
	18	225	222	189.667	157.333	125	120	-	-	-	-	-	-	-			18	-1.33333	-15.7037	-30.0741	-44.4444	-46.6667	-	-	-	-	-	-
	19	286	295	300	305	310	255	168.667	119.333	70	69.6667	69.3333	69	69			19	3.14685	4.8951	6.64336	8.39161	-10.8392	-41.0256	-58.2751	-75.5245	-75.641	-75.7576	-75.8741
	20	301	295	280	279	271	265	-	-	-	-	-	-	-			20	-1.99336	-6.97674	-7.30897	-9.96678	-11.9601	-	-	-	-	-	-
Mean		307.1	292.6	286.167	281.133	275.4	250.2	246.067	189.333	132.6	108.333	84.0667	72.2	59.8		Mean		-4.52384	-7.34674	-9.88846	-12.4302	-20.7725	-33.7478	-49.4761	-65.2044	-71.3992	-77.5939	-80.6236
SD		80.4045	73.3787	79.8495	87.357	95.7238	82.6339	51.4982	54.5816	58.8374	45.3955	33.3436	28.3224	24.7984		SD		5.86232	9.23325	13.9344	19.0825	16.3156	7.54416	8.9167	11.0668	8.1882	6.19788	5.7934
SEM		8.04045	7.33787	7.98495	8.7357	9.57238	8.26339	10.2996	10.9163	11.7675	9.07911	6.66872	5.66449	4.95968		SEM		0.586232	1.02592	1.54827	2.12027	1.81285	1.50883	1.78334	2.21336	1.63764	1.23958	1.15868
Acidic burn+gel	21	305	316	299.667	283.333	267	209	203.333	197.667	192	165.333	138.667	125	112		Acidic burn+gel	21	3.60656	-1.74863	-7.10383	-12.459	-31.4754	-33.3333	-35.1913	-37.0492	-45.7923	-54.5355	-59.0164
	22	290	290	272	240	219	211	209	206	204	189	174	167	159			22	0	-6.2069	-17.2414	-24.4828	-27.2414	-27.931	-28.9655	-29.6552	-34.8276	-40	-42.4138
	23	469	416	422	428	434	416	395.333	374.667	354	309.333	264.667	242	220			23	-11.3006	-10.0213	-8.742	-7.46269	-11.3006	-15.7072	-20.1137	-24.5203	-34.0441	-43.5679	-48.4009
	24	363	325	322	319	316	233	235.667	238.333	241	232	223	219	214			24	-10.4683	-11.2948	-12.1212	-12.9477	-35.8127	-35.0781	-34.3434	-33.6088	-36.0882	-38.5675	-39.6694
	25	250	267	237.333	207.667	178	170	-	-	-	-	-	-	-			25	6.8	-5.06667	-16.9333	-28.8	-32	-	-	-	-	-	-
	26	234	264	222	180	138	130	-	-	-	-	-	-	-			26	12.8205	-5.12821	-23.0769	-41.0256	-44.4444	-	-	-	-	-	-
	27	233	252	198.333	144.667	91	85	-	-	-	-	-	-	-			27	8.15451	-14.8784	-37.9113	-60.9442	-63.5193	-	-	-	-	-	-
	28	254	271	264.667	258.333	252	189	181.667	174.333	167	146	125	115	104			28	6.69291	4.19948	1.70604	-0.787402	-25.5906	-28.4777	-31.3648	-34.252	-42.5197	-50.7874	-54.7244
	29	309	298	293	289	284	211	-	-	-	-	-	-	-			29	-3.55987	-5.17799	-6.47249	-8.09061	-31.7152	-	-	-	-	-	-
	30	232	217	200	140	90	80	-	-	-	-	-	-	-			30	-6.46552	-13.7931	-39.6552	-61.2069	-65.5172	-	-	-	-	-	-
Mean		293.9	291.6	273.1	249	226.9	193.4	245	238.2	231.6	208.333	185.067	173.6	161.8		Mean		0.628014	-6.91383	-16.3314	-25.2072	-34.2727	-26.7985	-28.6969	-30.5091	-36.8699	-43.2307	-46.3021
SD		71.0274	51.1414	63.6873	83.1407	101.929	90.0991	77.1109	71.2487	65.6859	58.085	52.2657	50.1581	48.8688		SD		7.8913	5.64281	11.4209	19.2809	15.2076	6.99412	5.30906	3.87984	3.34244	4.72759	5.79766
SEM		7.10274	5.11414	6.36873	8.31407	10.1929	9.00991	15.4222	14.2497	13.1372	11.617	10.4531	10.0316	9.77376		SEM		0.78913	0.806116	1.63156	2.75442	2.17252	1.74853	1.32726	0.969961	0.83561	1.1819	1.44941
p (T-test) compared to Control		0.716348	0.973612	0.705624	0.434506	0.311862	0.180345	0.982208	0.307902	0.0549693	0.0265357	0.0115571	0.0078378	0.00584971		p (T-test) compared to Control		0.133316	0.790814	0.432748	0.268672	0.119132	0.298207	0.00574548	0.000500667	0.000118091	8.15645e-05	0.000132203
Acidic burn+Ag195	31	417	440	435	430	425	301	271.667	242.333	213	216.333	219.667	221	223		Acidic burn+Ag195	31	5.51559	4.31655	3.11751	1.91847	-27.8177	-34.8521	-41.8865	-48.9209	-48.1215	-47.3221	-47.0024
	32	387	329	320	311	302	299	264	229	194	192.333	190.667	190	189			32	-14.9871	-17.3127	-19.6382	-21.9638	-22.739	-31.7829	-40.8269	-49.8708	-50.3015	-50.7321	-50.9044
	33	264	286	271	256	241	253	225	197	169	161.333	153.667	150	146			33	8.33333	2.65152	-3.0303	-8.71212	-4.16667	-14.7727	-25.3788	-35.9848	-38.8889	-41.7929	-43.1818
	34	222	273	248.667	224.333	200	178	137.333	96.6667	56	44.6667	33.3333	28	22			34	22.973	12.012	1.05105	-9.90991	-19.8198	-38.1381	-56.4565	-74.7748	-79.8799	-84.985	-87.3874
	35	221	168	174.667	181.333	188	158	-	-	-	-	-	-	-			35	-23.9819	-20.9653	-17.9487	-14.9321	-28.5068	-	-	-	-	-	-
	36	214	167	173.333	179.667	186	173	145	113	82	77	72	70	68			36	-21.9626	-19.0031	-16.0436	-13.0841	-19.1589	-32.243	-47.1963	-61.6822	-64.0187	-66.3551	-67.2897
	37	202	106	120	134	148	138	-	-	-	-	-	-	-			37	-47.5248	-40.5941	-33.6634	-26.7327	-31.6832	-	-	-	-	-	-
	38	223	195	194.667	194.333	194	137	-	-	-	-	-	-	-			38	-12.5561	-12.7055	-12.855	-13.0045	-38.565	-	-	-	-	-	-
	39	243	280	260	240	221	216	-	-	-	-	-	-	-			39	15.2263	6.99588	-1.23457	-9.0535	-11.1111	-	-	-	-	-	-
	40	208	137	147	157	167	146	-	-	-	-	-	-	-			40	-34.1346	-29.3269	-24.5192	-19.7115	-29.8077	-	-	-	-	-	-
Mean		260.1	238.1	234.433	230.767	227.2	199.9	208.6	175.6	142.8	138.333	133.867	131.8	129.6		Mean		-10.3099	-13.7024	-14.5897	-15.477	-23.5199	-29.2342	-42.4646	-55.5782	-58.2722	-60.9663	-62.1908
SD		73.2126	96.8467	89.0889	82.512	77.409	60.6407	57.3401	59.8533	62.3968	66.4292	70.5895	72.4828	74.6903		SD		21.5872	15.7966	10.5827	6.06702	10.1821	8.71727	11.3222	14.3374	15.3229	16.4187	16.9528
SEM		7.32126	9.68467	8.90889	8.2512	7.7409	6.06407	11.468	11.9707	12.4794	13.2858	14.1179	14.4966	14.9381		SEM		2.15872	2.25665	1.51181	0.866717	1.45459	2.17932	2.83055	3.58434	3.83071	4.10467	4.2382
p (T-test) compared to Control		0.211133	0.195134	0.21092	0.224663	0.255463	0.158227	0.359395	0.743279	0.817964	0.477171	0.237819	0.164121	0.114017		p (T-test) compared to Control		0.447832	0.545657	0.713378	0.911681	0.646945	0.55756	0.321697	0.237047	0.103011	0.0506475	0.0382559
p (T-test) compared to Gel		0.333365	0.16004	0.303497	0.646115	0.994467	0.859512	0.470418	0.21536	0.0856173	0.151278	0.277253	0.370675	0.49114		p (T-test) compared to Gel		0.170511	0.430029	0.650115	0.198444	0.151442	0.681329	0.0636561	0.0116872	0.0474252	0.168672	0.282102
Acidic burn+Ag197	41	403	263	256.333	249.667	243	249	219	189	159	159.333	159.667	160	160		Acidic burn+Ag197	41	-34.7395	-36.3937	-38.048	-39.7022	-38.2134	-45.6576	-53.1017	-60.5459	-60.4632	-60.3805	-60.2978
	42	260	137	114	92	69	44	-	-	-	-	-	-	-			42	-47.3077	-56.1538	-64.6154	-73.4615	-83.0769	-	-	-	-	-	-
	43	301	221	214.333	207.667	201	126	92	58	24	19	14	12	9			43	-26.5781	-28.7929	-31.0078	-33.2226	-58.1395	-69.4352	-80.7309	-92.0266	-93.6877	-95.3488	-96.0133
	44	295	192	188.333	184.667	181	122	83.3333	44.6667	6	4	2	1	0			44	-34.9153	-36.1582	-37.4011	-38.6441	-58.6441	-71.7514	-84.8588	-97.9661	-98.6441	-99.322	-99.661
	45	291	166	151.333	136.667	122	58	-	-	-	-	-	-	-			45	-42.9553	-47.9954	-53.0355	-58.0756	-80.0687	-	-	-	-	-	-
	46	291	145	131	117	103	49	-	-	-	-	-	-	-			46	-50.1718	-54.9828	-59.7938	-64.6048	-83.1615	-	-	-	-	-	-
	47	232	119	99.6667	80.3333	61	25	-	-	-	-	-	-	-			47	-48.7069	-57.0402	-65.3736	-73.7069	-89.2241	-	-	-	-	-	-
	48	229	108	77.3333	46.6667	16	30	-	-	-	-	-	-	-			48	-52.8384	-66.23	-79.6215	-93.0131	-86.8996	-	-	-	-	-	-
	49	349	228	222	217	212	186	151	117	83	82	81	81	80			49	-34.6705	-36.3897	-37.8223	-39.255	-46.7049	-56.7335	-66.4756	-76.2178	-76.5043	-76.7908	-76.7908
	50	311	236	235	234	233	244	203.333	162.667	122	97	72	60	47			50	-24.1158	-24.4373	-24.7588	-25.0804	-21.5434	-34.6195	-47.6956	-60.7717	-68.8103	-76.8489	-80.7074
Mean		296.2	181.5	168.933	156.567	144.1	113.3	149.733	114.267	78.8	72.2667	65.7333	62.8	59.2		Mean		-39.6999	-47.9684	-53.6121	-59.3039	-72.1785	-62.2814	-72.8971	-83.5129	-84.265	-85.0171	-85.324
SD		49.4364	51.2899	59.3397	67.6287	76.1754	82.3104	55.5239	56.4716	57.6521	56.1868	56.2745	56.8978	57.9082		SD		9.59024	12.1096	15.7735	19.5739	17.1129	11.7928	14.0985	16.4201	16.9516	17.4961	17.7588
SEM		4.94364	5.12899	5.93397	6.76287	7.61754	8.23104	11.1048	11.2943	11.5304	11.2374	11.2549	11.3796	11.5816		SEM		0.959024	1.5137	1.97169	2.44673	2.13912	3.93093	4.69951	5.47337	5.65054	5.83203	5.91959
p (T-test) compared to Control		0.733024	0.00155718	0.00236429	0.00331655	0.0047504	0.00243867	0.0344878	0.0923026	0.227779	0.347226	0.590449	0.774918	0.985268		p (T-test) compared to Control		2.33689e-08	2.40519e-06	4.20697e-05	0.000289663	2.6526e-05	0.0111947	0.047044	0.154457	0.258823	0.483196	0.653354
p (T-test) compared to Gel		0.733762	0.000226057	0.00188464	0.0101114	0.0313109	0.0176961	0.109926	0.0516991	0.0240432	0.0317339	0.04723	0.0603073	0.0793491		p (T-test) compared to Gel		1.15041e-07	9.11681e-07	0.000118356	0.00350685	0.000458632	0.00407607	0.00186566	0.00118374	0.0026814	0.00728989	0.0125552
Alkali burn	51	207	206	196.333	186.667	177	157	126.667	96.3333	66	60.3333	54.6667	52	49		Alkali burn	51	-0.483092	-5.15298	-9.82287	-14.4928	-24.1546	-38.8084	-53.4622	-68.1159	-70.8535	-73.591	-74.8792
	52	247	249	241.333	233.667	226	218	183.333	148.667	114	105	96	92	87			52	0.809717	-2.2942	-5.39811	-8.50202	-11.7409	-25.776	-39.8111	-53.8462	-57.4899	-61.1336	-62.753
	53	221	220	221.333	222.667	224	210	173.667	137.333	101	94.3333	87.6667	84	81			53	-0.452489	0.15083	0.754148	1.35747	-4.97738	-21.4178	-37.8582	-54.2986	-57.3152	-60.3318	-61.991
	54	260	292	283.333	274.667	266	226	189.667	153.333	117	107.667	98.3333	94	89			54	12.3077	8.97436	5.64103	2.30769	-13.0769	-27.0513	-41.0256	-55	-58.5897	-62.1795	-63.8462
	55	140	100	91.3333	82.6667	74	70	-	-	-	-	-	-	-			55	-28.5714	-34.7619	-40.9524	-47.1429	-50	-	-	-	-	-	-
	56	157	167	157	147	137	88	-	-	-	-	-	-	-			56	6.36943	0	-6.36943	-12.7389	-43.949	-	-	-	-	-	-
	57	156	146	142.333	138.667	135	83	-	-	-	-	-	-	-			57	-6.41026	-8.76068	-11.1111	-13.4615	-46.7949	-	-	-	-	-	-
	58	187	182	172.667	163.333	154	121	-	-	-	-	-	-	-			58	-2.6738	-7.66488	-12.656	-17.6471	-35.2941	-	-	-	-	-	-
	59	180	172	161.667	151.333	141	105	-	-	-	-	-	-	-			59	-4.44444	-10.1852	-15.9259	-21.6667	-41.6667	-	-	-	-	-	-
	60	203	195	184.333	173.667	163	155	122.667	90.3333	58	48.6667	39.3333	35	30			60	-3.94089	-9.1954	-14.4499	-19.7044	-23.6453	-39.5731	-55.5008	-71.4286	-76.0263	-80.624	-82.7586
Mean		195.8	192.9	185.167	177.433	169.7	143.3	159.2	125.2	91.2	83.2	75.2	71.4	67.2		Mean		-2.74896	-6.889	-11.0291	-15.1691	-29.53	-30.5253	-45.5316	-60.5379	-64.0549	-67.572	-69.2456
SD		37.5308	50.9263	51.3479	52.0113	52.9076	55.8785	28.6811	26.6021	24.5715	24.1381	23.796	23.644	23.5491		SD		10.0868	10.8166	11.8547	13.1284	15.3592	7.32179	7.40524	7.62115	7.84761	8.11831	8.22529
SEM		3.75308	5.09263	5.13479	5.20113	5.29076	5.58785	5.73622	5.32042	4.91431	4.82762	4.7592	4.72881	4.70982		SEM		1.00868	1.08166	1.18547	1.31284	1.53592	1.46436	1.48105	1.52423	1.56952	1.62366	1.64506
Alkali burn+gel	61	204	191	180.667	170.333	160	142	111.667	81.3333	51	39.3333	27.6667	22	16		Alkali burn+gel	61	-6.37255	-11.4379	-16.5033	-21.5686	-30.3922	-45.2614	-60.1307	-75	-80.719	-86.4379	-89.2157
	62	212	206	195	184	173	167	131.667	96.3333	61	50	39	34	28			62	-2.83019	-8.01887	-13.2075	-18.3962	-21.2264	-37.8931	-54.5597	-71.2264	-76.4151	-81.6038	-83.9623
	63	206	193	183.667	174.333	165	165	130.333	95.6667	61	49.3333	37.6667	32	26			63	-6.31068	-10.8414	-15.3722	-19.9029	-19.9029	-36.7314	-53.5599	-70.3883	-76.0518	-81.7152	-84.466
	64	233	222	216.667	211.333	206	208	163	118	73	59	45	38	31			64	-4.72103	-7.01001	-9.299	-11.588	-10.7296	-30.0429	-49.3562	-68.6695	-74.6781	-80.6867	-83.691
	65	104	94	83	72	61	31	106	75	44	29.3333	14.6667	7	0			65	-9.61538	-20.1923	-30.7692	-41.3462	-70.1923	1.92308	-27.8846	-57.6923	-71.7949	-85.8974	-93.2692
	66	192	177	157.667	138.333	119	132	-	-	-	-	-	-	-			66	-7.8125	-17.8819	-27.9514	-38.0208	-31.25	-	-	-	-	-	-
	67	114	115	111	107	103	84	-	-	-	-	-	-	-			67	0.877193	-2.63158	-6.14035	-9.64912	-26.3158	-	-	-	-	-	-
	68	142	164	146.667	129.333	112	118	-	-	-	-	-	-	-			68	15.493	3.28638	-8.92019	-21.1268	-16.9014	-	-	-	-	-	-
	69	191	165	149.333	133.667	118	124	-	-	-	-	-	-	-			69	-13.6126	-21.815	-30.0175	-38.2199	-35.0785	-	-	-	-	-	-
	70	199	185	176.667	168.333	160	137	106	75	44	29.3333	14.6667	7	0			70	-7.03518	-11.2228	-15.4104	-19.598	-31.1558	-46.7337	-62.3116	-77.8894	-85.2596	-92.6298	-96.4824
Mean		177.556	169.667	158.185	146.704	135.222	130.111	124.778	90.2222	55.6667	42.7222	29.7778		16.8333		Mean		-3.87831	-10.7765	-17.3591	-23.9417	-29.3145	-32.4566	-51.3005	-70.1443	-77.4864	-84.8285	-88.5144
SD		43.2977	39.2711	39.4697	40.261	41.6114	48.2158	20.0681	15.1714	10.419	11.0427	11.8332		12.7595		SD		7.85249	7.39953	8.60242	10.6836	15.411	16.3474	11.3065	6.35115	4.36574	4.11986	4.94918
SEM		4.81086	4.36346	4.38552	4.47345	4.62349	5.35731	3.34468	2.52857	1.7365	1.84045	1.9722		2.12659		SEM		0.872499	0.739953	0.860242	1.06836	1.5411	2.72456	1.88442	1.05853	0.727624	0.686643	0.824863
p (T-test) compared to Control		0.365141	0.310719	0.244785	0.194293	0.156605	0.610944	0.0640164	0.0355288	0.0174272	0.0089162	0.00481531		0.00277848		p (T-test) compared to Control		0.801346	0.385253	0.211174	0.137387	0.976624	0.829892	0.398805	0.0691869	0.0101875	0.00261217	0.00189476
Alkali burn+Ag195	71	261	257	246.333	235.667	225	149	136.333	123.667	111	90.3333	69.6667	59	49		Alkali burn+Ag195	71	-1.53257	-5.61941	-9.70626	-13.7931	-42.9119	-47.765	-52.6181	-57.4713	-65.3895	-73.3078	-77.3946
	72	213	207	191.333	175.667	160	94	63.6667	33.3333	3	2	1	1	0			72	-2.8169	-10.1721	-17.5274	-24.8826	-55.8685	-70.1095	-84.3505	-98.5915	-99.061	-99.5305	-99.5305
	73	234	229	207.667	186.333	165	110	90.6667	71.3333	52	39.3333	26.6667	20	14			73	-2.13675	-11.2536	-20.3704	-29.4872	-52.9915	-61.2536	-69.5157	-77.7778	-83.1909	-88.604	-91.453
	74	256	218	200.333	182.667	165	100	79.6667	59.3333	39	28.3333	17.6667	12	7			74	-14.8438	-21.7448	-28.6458	-35.5469	-60.9375	-68.8802	-76.8229	-84.7656	-88.9323	-93.099	-95.3125
	75	235	213	196	179	163	97	-	-	-	-	-	-	-			75	-9.3617	-16.5957	-23.8298	-30.6383	-58.7234	-	-	-	-	-	-
	76	204	202	180	158	136	94	-	-	-	-	-	-	-			76	-0.980392	-11.7647	-22.549	-33.3333	-53.9216	-	-	-	-	-	-
	77	189	188	167	146	125	82	-	-	-	-	-	-	-			77	-0.529101	-11.6402	-22.7513	-33.8624	-56.6138	-	-	-	-	-	-
	78	182	184	159.333	134.667	110	46	-	-	-	-	-	-	-			78	1.0989	-12.4542	-26.0073	-39.5604	-74.7253	-	-	-	-	-	-
	79	136	103	94	85	76	20	-	-	-	-	-	-	-			79	-24.2647	-30.8824	-37.5	-44.1176	-85.2941	-	-	-	-	-	-
	80	236	246	225	204	183	138	114.667	91.3333	68	60	52	48	44			80	4.23729	-4.66102	-13.5593	-22.4576	-41.5254	-51.4124	-61.2994	-71.1864	-74.5763	-77.9661	-79.661
Mean		214.6	204.7	186.7	168.7	150.8	93	97	75.8	54.6	44	33.4	28	22.8		Mean		-5.11297	-14.6808	-23.2097	-31.6913	-60.2208	-62.0021	-70.8268	-79.6516	-84.1434	-88.6353	-90.9227
SD		36.2331	40.4229	39.4102	38.9679	39.1454	36.2988	25.7328	30.4205	35.4209	29.7792	24.5107	21.9545	19.9138		SD		8.18891	7.09418	7.19039	8.24138	11.857	8.89233	11.7486	14.8354	12.2279	9.6639	8.31647
SEM		3.62331	4.04229	3.94102	3.89679	3.91454	3.62988	5.14656	6.08409	7.08418	5.95584	4.90214	4.3909	3.98276		SEM		0.818891	0.788242	0.798932	0.915709	1.31745	2.22308	2.93715	3.70884	3.05697	2.41597	2.07912
p (T-test) compared to Control		0.293907	0.59281	0.944129	0.691593	0.400289	0.0361169	0.0120857	0.0402582	0.127937	0.0750638	0.0401125	0.0274877	0.0205318		p (T-test) compared to Control		0.591862	0.100718	0.021703	0.00696008	0.000269188	0.0013451	0.0103968	0.0634312	0.0338027	0.0165399	0.0107246
p (T-test) compared to Gel		0.0719018	0.088262	0.15494	0.268501	0.437492	0.0890703	0.102349	0.380665	0.950751	0.931742	0.778797	0.698842	0.600071		p (T-test) compared to Gel		0.755487	0.283439	0.148844	0.115017	0.000256845	0.0182917	0.0462657	0.248898	0.306278	0.466214	0.622017
Alkali burn+Ag197	81	237	215	199.333	183.667	168	158	115.667	73.3333	31	24.6667	18.3333	15	12		Alkali burn+Ag197	81	-9.2827	-15.8931	-22.5035	-29.1139	-33.3333	-51.1955	-69.0577	-86.9198	-89.5921	-92.2644	-93.6709
	82	252	237	244.333	251.667	259	211	169.667	128.333	87	66.3333	45.6667	35	25			82	-5.95238	-3.04233	-0.132275	2.77778	-16.2698	-32.672	-49.0741	-65.4762	-73.6772	-81.8783	-86.1111
	83	238	230	221.333	212.667	204	176	143.667	111.333	79	59.6667	40.3333	31	21			83	-3.36134	-7.0028	-10.6443	-14.2857	-26.0504	-39.6359	-53.2213	-66.8067	-74.93	-83.0532	-86.9748
	84	252	271	273	275	277	247	206	165	124	122.333	120.667	120	119			84	7.53968	8.33333	9.12698	9.92063	-1.98413	-18.254	-34.5238	-50.7937	-51.455	-52.1164	-52.381
	85	175	144	127	110	93	29	-	-	-	-	-	-	-			85	-17.7143	-27.4286	-37.1429	-46.8571	-83.4286	-	-	-	-	-	-
	86	220	196	182.333	168.667	155	143	-	-	-	-	-	-	-			86	-10.9091	-17.1212	-23.3333	-29.5455	-35	-	-	-	-	-	-
	87	176	171	146	121	96	82	-	-	-	-	-	-	-			87	-2.84091	-17.0455	-31.25	-45.4545	-53.4091	-	-	-	-	-	-
	88	179	183	172	161	150	135	-	-	-	-	-	-	-			88	2.23464	-3.91061	-10.0559	-16.2011	-24.581	-	-	-	-	-	-
	89	170	112	86.6667	61.3333	36	30	-	-	-	-	-	-	-			89	-34.1176	-49.0196	-63.9216	-78.8235	-82.3529	-	-	-	-	-	-
	90	252	254	259	263	268	229	188	147	106	94	83	78	72			90	0.793651	2.77778	4.36508	6.34921	-9.12698	-25.3968	-41.6667	-57.9365	-62.6984	-67.0635	-69.0476
Mean		215.1	201.3	191.1	180.8	170.6	144	164.6	125	85.4	73.4	61.6	55.8	49.8		Mean		-7.36104	-14.6812	-21.0952	-27.5092	-39.601	-35.4393	-51.4692	-67.4991	-72.4136	-77.3281	-79.7844
SD		34.0395	47.3921	57.1178	67.139	77.5348	73.2735	31.9996	31.4685	31.3598	32.9615	36.1247	38.28	40.3851		SD		11.2179	15.616	20.5092	25.7278	26.6005	11.9254	12.3015	12.8531	13.6225	15.1014	16.0897
SEM		3.40395	4.73921	5.71178	6.7139	7.75348	7.32735	6.39992	6.2937	6.27197	6.59231	7.22494	7.656	8.07703		SEM		1.12179	1.73511	2.2788	2.85865	2.95561	2.98136	3.07537	3.21327	3.40563	3.77534	4.02242
p (T-test) compared to Control		0.268122	0.721388	0.819343	0.906653	0.977369	0.982069	0.807896	0.992493	0.77833	0.644248	0.547018	0.507665	0.477933		p (T-test) compared to Control		0.371181	0.244538	0.226906	0.223454	0.34691	0.524368	0.455639	0.402914	0.342885	0.311004	0.299093
p (T-test) compared to Gel		0.0620777	0.154781	0.189249	0.227305	0.264524	0.653965	0.0491492	0.0585666	0.07982	0.0848678	0.0993731	0.11065	0.12159		p (T-test) compared to Gel		0.473001	0.512416	0.624615	0.70867	0.337392	0.78627	0.984564	0.709733	0.46937	0.332232	0.298266

## Sheet: Necropsy
Group	Rat#	Internal organs weight, mg			7days		Group	Rat #	BWt, g	Internal organs relative weight, mg/g
		Lymph nodes	Thymus	Spleen	BWt, %					Lymph nodes	Thymus	Spleen
Control	2	596	366	621	5.97015		Control	2	142	4.19718	2.57746	4.37324
	5	354	220	797	8.88889			5	147	2.40816	1.4966	5.42177
	6	382	333	821	10.2041			6	162	2.35802	2.05556	5.0679
	7	344	369	617	13.9073			7	172	2	2.14535	3.58721
	9	299	314	607	3.62319			9	143	2.09091	2.1958	4.24476
Mean		395	320.4	692.6	8.51872		Mean		153.2	2.61086	2.09415	4.53897
SD		103.988	54.2609	95.4518	3.53484		SD		11.822	0.808076	0.347881	0.644822
SEM		20.7977	10.8522	19.0904	0.706968		SEM		2.3644	0.161615	0.0695762	0.128964
Acidic burn	15	558	298	807	7.47126		Acidic burn	15	187	2.98396	1.59358	4.31551
	16	355	223	591	3.07692			16	134	2.64925	1.66418	4.41045
	17	491	274	670	3.46821			17	179	2.74302	1.53073	3.74302
	18	624	315	801	8.3871			18	168	3.71429	1.875	4.76786
	20	273	147	589	1.55039			20	131	2.08397	1.12214	4.49618
Mean		460.2	251.4	691.6	4.79078		Mean		159.8	2.8349	1.55713	4.3466
SD		129.193	60.7177	96.3319	2.65726		SD		23.1119	0.529592	0.246473	0.337398
SEM		25.8387	12.1435	19.2664	0.531452		SEM		4.62238	0.105918	0.0492947	0.0674797
p (T-test) compared to Control		0.454363	0.128579	0.988595	0.130282		p (T-test) compared to Control		0.624842	0.655165	0.0358521	0.611383
Acidic burn+gel	25	474	240	999	-3.24324		Acidic burn+gel	25	179	2.64804	1.34078	5.58101
	26	712	393	739	5.73248			26	166	4.28916	2.36747	4.45181
	27	501	336	714	-1.16279			27	170	2.94706	1.97647	4.2
	29	562	323	817	-1.16279			29	172	3.26744	1.87791	4.75
	30	381	292	968	1.71429			30	178	2.14045	1.64045	5.4382
Mean		526	316.8	847.4	0.375589		Mean		173	3.05843	1.84062	4.8842
SD		109.769	50.4516	116.617	3.10862		SD		4.89898	0.718593	0.342731	0.541398
SEM		21.9538	10.0903	23.3233	0.621724		SEM		0.979796	0.143719	0.0685462	0.10828
p (T-test) compared to Control		0.121373	0.924977	0.0739993	0.00857042		p (T-test) compared to Control		0.0147883	0.431788	0.329471	0.435936
p (T-test) compared to Burn		0.459924	0.136131	0.0733551	0.0628633		p (T-test) compared to Burn		0.296238	0.62998	0.216104	0.130388
Acidic burn+Ag 195	35	358	292	956	5.45455		Acidic burn+Ag 195	35	174	2.05747	1.67816	5.49425
	37	479	286	946	-1.62162			37	182	2.63187	1.57143	5.1978
	38	364	114	725	-3.44828			38	168	2.16667	0.678571	4.31548
	39	565	296	898	2.45399			39	167	3.38323	1.77246	5.37725
	40	494	235	835	1.24224			40	163	3.03067	1.44172	5.1227
Mean		452	244.6	872	0.816174		Mean		170.8	2.65398	1.42847	5.1015
SD		79.8023	68.922	85.0717	3.1147		SD		6.61513	0.503487	0.390802	0.414209
SEM		15.9605	13.7844	17.0143	0.62294		SEM		1.32303	0.100697	0.0781604	0.0828419
p (T-test) compared to Control		0.4098	0.122204	0.0229776	0.0113595		p (T-test) compared to Control		0.031698	0.930043	0.0344612	0.1803
p (T-test) compared to Burn		0.916656	0.885957	0.0229356	0.0881308		p (T-test) compared to Burn		0.386869	0.633801	0.592815	0.0222847
Acidic burn+Ag 197	42	563	351	1060	2.24719		Acidic burn+Ag 197	42	182	3.09341	1.92857	5.82418
	45	521	342	856	-0.595238			45	167	3.11976	2.0479	5.12575
	46	670	279	1042	-1.28205			46	154	4.35065	1.81169	6.76623
	47	596	311	949	-1.28205			47	161	3.70186	1.93168	5.89441
	48	612	231	877	-9.83607			48	165	3.70909	1.4	5.31515
Mean		592.4	302.8	956.8	-2.14964		Mean		165.8	3.59495	1.82397	5.78514
SD		49.7618	43.929	83.0648	4.05795		SD		9.23905	0.463226	0.224762	0.571261
SEM		9.95237	8.78581	16.613	0.81159		SEM		1.84781	0.0926452	0.0449524	0.114252
p (T-test) compared to Control		0.00902568	0.627713	0.00309671	0.00414948		p (T-test) compared to Control		0.131558	0.067548	0.228273	0.0201029
p (T-test) compared to Burn		0.0925633	0.207386	0.00312278	0.0210964		p (T-test) compared to Burn		0.642636	0.0627409	0.14828	0.00249011
Alkali burn	45	709	358	871	-2.91262		Alkali burn	182	200	3.545	1.79	4.355
	46	329	222	526	1.26582			167	160	2.05625	1.3875	3.2875
	47	395	254	759	-0.645161			154	154	2.56494	1.64935	4.92857
	48	392	290	756	-3.06748			165	158	2.48101	1.83544	4.78481
	49	432	262	615	4.48718			182	163	2.65031	1.60736	3.77301
Mean		451.4	277.2	705.4	-0.174453		Mean		167	2.6595	1.65393	4.22578
SD		132.985	45.845	121.007	2.82468		SD		16.7571	0.487628	0.157884	0.617819
SEM		26.597	9.16899	24.2014	0.564935		SEM		3.35142	0.0975256	0.0315768	0.123564
p (T-test) compared to Control		0.522822	0.258538	0.872198	0.00493004		p (T-test) compared to Control		0.215246	0.920435	0.0501065	0.502926
Alkali burn+gel	0	427	276	653	1.36986		Alkali burn+gel	0.212902	148	2.88514	1.86486	4.41216
	51	593	403	855	4.81283			172	196	3.02551	2.05612	4.36224
	52	349	359	713	-2.22222			145	176	1.98295	2.03977	4.05114
	53	411	337	836	4.16667			152	175	2.34857	1.92571	4.77714
	54	653	300	922	2.5974			156	158	4.13291	1.89873	5.83544
Mean		486.6	335	795.8	2.14491		Mean		170.6	2.87502	1.95704	4.68763
SD		115.941	44.5197	98.28	2.4933		SD		16.5118	0.731843	0.0768624	0.618445
SEM		23.1881	8.90393	19.656	0.498659		SEM		3.30236	0.146369	0.0153725	0.123689
p (T-test) compared to Control		0.27329	0.688324	0.170355	0.0185117		p (T-test) compared to Control		0.124944	0.640949	0.463591	0.747872
p (T-test) compared to Burn		0.700313	0.108063	0.279574	0.253216		p (T-test) compared to Burn		0.767377	0.637198	0.00866545	0.32153
Alkali burn+Ag195	75	412	210	684	7.75194		Alkali burn+Ag195	75	139	2.96403	1.51079	4.92086
	76	516	235	575	8.0292			76	148	3.48649	1.58784	3.88514
	77	426	199	957	7.97101			77	149	2.85906	1.33557	6.42282
	78	462	209	560	0			78	145	3.18621	1.44138	3.86207
	79	427	261	866	-2.82486			79	172	2.48256	1.51744	5.03488
Mean		448.6	222.8	728.4	4.18546		Mean		150.6	2.99567	1.4786	4.82515
SD		37.5212	22.4891	158.148	4.65805		SD		11.2534	0.33471	0.0852299	0.939877
SEM		7.50424	4.49782	31.6295	0.93161		SEM		2.25069	0.0669419	0.017046	0.187975
p (T-test) compared to Control		0.3606	0.0104883	0.708412	0.176594		p (T-test) compared to Control		0.758194	0.404559	0.00886025	0.629087
p (T-test) compared to Burn		0.968666	0.0657249	0.823111	0.148116		p (T-test) compared to Burn		0.142826	0.288541	0.0864057	0.317624
Alkali burn+Ag197	85	539	257	898	-1.66667		Alkali burn+Ag197	85	177	3.0452	1.45198	5.07345
	86	428	223	734	3.00752			86	137	3.12409	1.62774	5.35766
	87	692	187	866	0			87	146	4.73973	1.28082	5.93151
	88	458	183	614	10.3704			88	149	3.07383	1.22819	4.12081
	89	435	231	733	7.97546			89	176	2.47159	1.3125	4.16477
Mean		510.4	216.2	769	3.93734		Mean		157	3.29089	1.38024	4.92964
SD		99.0123	27.874	102.563	4.59265		SD		16.4073	0.762323	0.144218	0.699551
SEM		19.8025	5.5748	20.5126	0.918531		SEM		3.28146	0.152465	0.0288435	0.13991
p (T-test) compared to Control		0.146635	0.0091377	0.30721	0.15253		p (T-test) compared to Control		0.716825	0.255676	0.0053009	0.435299
p (T-test) compared to Burn		0.496867	0.0525743	0.445779	0.165717		p (T-test) compared to Burn		0.418567	0.200405	0.0336589	0.169908
Group	Rat#	Internal organs weight, mg			14 days		Group	Rat#	BWt, g	Internal organs relative weight, mg/g
		Lymph nodes	Thymus	Spleen	BWt,%					Lymph nodes	Thymus	Spleen
Control	1	592	321	999	33.5616		Control	1	195	3.0359	1.64615	5.12308
	3	607	300	966	23.1884			3	170	3.57059	1.76471	5.68235
	4	598	317	1226	44.0559			4	206	2.90291	1.53883	5.95146
	8	562	285	1091	53.4351			8	201	2.79602	1.41791	5.42786
	10	520	325	735	36.4341			10	176	2.95455	1.84659	4.17614
Mean		575.8	309.6	1003.4	38.135		Mean		189.6	3.05199	1.64284	5.27218
SD		31.7263	14.9613	161.667	10.1623		SD		14.1223	0.270719	0.153484	0.61277
SEM		6.34527	2.99226	32.3334	2.03246		SEM		2.82446	0.0541438	0.0306968	0.122554
Acidic burn	11	507	490	1237	25.8427		Acidic burn	11	224	2.26339	2.1875	5.52232
	12	692	403	814	34			12	201	3.44279	2.00498	4.04975
	13	667	356	984	38.4			13	173	3.85549	2.0578	5.68786
	14	680	378	910	29.8611			14	187	3.63636	2.02139	4.86631
	19	624	321	838	33.0579			19	161	3.87578	1.99379	5.20497
Mean		634	389.6	956.6	32.2323		Mean		189.2	3.41476	2.05309	5.06624
SD		67.5248	56.9723	152.281	4.20229		SD		21.9672	0.597046	0.0706043	0.580843
SEM		13.505	11.3945	30.4562	0.840459		SEM		4.39345	0.119409	0.0141209	0.116169
p (T-test) compared to Control		0.296497	0.0390868	0.293635	0.342559		p (T-test) compared to Control		0.798034	0.391581	0.000523273	0.228995
Acidic burn+gel	21	450	302	1121	29.0076		Acidic burn+gel	21	169	2.66272	1.78698	6.63314
	22	480	274	922	14.9171			22	208	2.30769	1.31731	4.43269
	23	488	297	1118	4.04624			23	180	2.71111	1.65	6.21111
	24	821	437	1110	24.0506			24	196	4.18878	2.22959	5.66327
	28	819	427	1079	16.4634			28	191	4.28796	2.2356	5.64921
Mean		611.6	347.4	1070	17.697		Mean		188.8	3.23165	1.8439	5.71788
SD		170.63	69.79	75.4851	8.53102		SD		13.3776	0.834292	0.352229	0.740321
SEM		34.126	13.958	15.097	1.7062		SEM		2.67552	0.166858	0.0704457	0.148064
p (T-test) compared to Control		0.828416	0.334966	0.994225	0.0273308		p (T-test) compared to Control		0.696534	0.763562	0.269249	0.71265
p (T-test) compared to Burn		0.813271	0.376264	0.218802	0.0156563		p (T-test) compared to Burn		0.975948	0.730348	0.277706	0.203442
Acidic burn+Ag195	31	675	366	1376	15.1042		Acidic burn+Ag195	31	221	3.0543	1.65611	6.22624
	32	609	284	1415	19.3939			32	197	3.09137	1.44162	7.18274
	33	506	385	1098	14.5349			33	197	2.56853	1.95431	5.5736
	34	410	281	934	6.89655			34	186	2.2043	1.51075	5.02151
	36	416	288	918	5.11364			36	185	2.24865	1.55676	4.96216
Mean		523.2	320.8	1148.2	12.2086		Mean		197.2	2.63343	1.62391	5.79325
SD		104.887	45.1194	211.881	5.36622		SD		12.9677	0.380332	0.179302	0.830989
SEM		20.9775	9.02388	42.3763	1.07324		SEM		2.59353	0.0760663	0.0358604	0.166198
p (T-test) compared to Control		0.365156	0.65006	0.308858	0.0019705		p (T-test) compared to Control		0.450771	0.110702	0.87655	0.342353
p (T-test) compared to Burn		0.113565	0.094932	0.180129	0.000371828		p (T-test) compared to Burn		0.547991	0.0583097	0.00212702	0.189442
Acidic burn+Ag197	41	653	340	1568	26.1146		Acidic burn+Ag197	41	198	3.29798	1.71717	7.91919
	43	625	460	1244	23.4973			43	226	2.76549	2.0354	5.50442
	44	615	431	1214	42.0382			44	223	2.75785	1.93274	5.44395
	49	605	359	1165	10.7345			49	196	3.08673	1.83163	5.94388
	50	593	345	1010	9.03226			50	169	3.50888	2.04142	5.97633
Mean		618.2	387	1240.2	22.2834		Mean		202.4	3.08338	1.91167	6.15755
SD		20.3804	49.0347	182.648	11.9614		SD		20.7711	0.294665	0.123954	0.907489
SEM		4.07608	9.80694	36.5295	2.39228		SEM		4.15423	0.0589331	0.0247908	0.181498
p (T-test) compared to Control		0.0546663	0.0165715	0.0881243	0.0780699		p (T-test) compared to Control		0.33793	0.879208	0.0260345	0.144512
p (T-test) compared to Burn		0.666027	0.946546	0.0441869	0.155178		p (T-test) compared to Burn		0.407981	0.348682	0.0826989	0.0773696
Alkali burn	51	756	521	1383	25.5952		Alkali burn	51	211	3.58294	2.46919	6.5545
	52	611	347	1183	38.5714			52	194	3.14948	1.78866	6.09794
	53	850	284	1252	41.7808			53	207	4.10628	1.37198	6.04831
	54	645	310	1158	23.5669			54	194	3.32474	1.59794	5.96907
	60	593	337	862	21.7391			60	196	3.02551	1.71939	4.39796
Mean		691	359.8	1167.6	30.2507		Mean		200.4	3.43779	1.78943	5.81356
SD		97.5971	83.5402	171.605	8.25799		SD		7.17217	0.383098	0.368217	0.736625
SEM		19.5194	16.708	34.321	1.6516		SEM		1.43443	0.0766197	0.0736434	0.147325
p (T-test) compared to Control		0.0549878	0.270773	0.201131	0.262921		p (T-test) compared to Control		0.209793	0.138621	0.483361	0.291208
Alkali burn+gel	61	444	221	925	22.5352		Alkali burn+gel	61	174	2.55172	1.27011	5.31609
	62	495	352	728	27.3333			62	191	2.59162	1.84293	3.81152
	63	556	255	970	40.411			63	205	2.7122	1.2439	4.73171
	64	601	265	765	14.8387			64	178	3.3764	1.48876	4.29775
	70	766	411	1075	41.8919			70	210	3.64762	1.95714	5.11905
Mean		572.4	300.8	892.6	29.402		Mean		191.6	2.97591	1.56057	4.65522
SD		110.495	70.0183	129.372	10.3992		SD		14.2352	0.449165	0.292163	0.547239
SEM		22.0989	14.0037	25.8743	2.07984		SEM		2.84703	0.0898329	0.0584327	0.109448
p (T-test) compared to Control		0.954282	0.812015	0.31574	0.264016		p (T-test) compared to Control		0.846863	0.77909	0.631509	0.17152
p (T-test) compared to Burn		0.146294	0.310557	0.0336868	0.901446		p (T-test) compared to Burn		0.301629	0.15627	0.358686	0.0355557
Alkali burn+Ag195	71	847	390	1422	49.6124		Alkali burn+Ag195	71	193	4.3886	2.02073	7.36788
	72	762	210	1422	33.0882			72	181	4.20994	1.16022	7.85635
	73	641	327	1230	21.5686			73	186	3.44624	1.75806	6.6129
	74	540	272	1024	22.0126			74	194	2.78351	1.40206	5.27835
	80	726	275	1018	20.9877			80	196	3.70408	1.40306	5.19388
Mean		703.2	294.8	1223.2	29.4539		Mean		190	3.70647	1.54883	6.46187
SD		105.032	60.3371	179.375	11.0345		SD		5.62139	0.57243	0.303404	1.07673
SEM		21.0064	12.0674	35.875	2.2069		SEM		1.12428	0.114486	0.0606809	0.215347
p (T-test) compared to Control		0.0487448	0.646695	0.106178	0.280494		p (T-test) compared to Control		0.959316	0.0725486	0.595383	0.091033
p (T-test) compared to Burn		0.869093	0.242664	0.66607	0.910799		p (T-test) compared to Burn		0.0518648	0.45776	0.342702	0.349381
Alkali burn+Ag197	81	536	251	1335	13.6842		Alkali burn+Ag197	81	216	2.48148	1.16204	6.18056
	82	492	231	767	22.7848			82	194	2.53608	1.19072	3.95361
	83	492	231	767	35.6164			83	198	2.48485	1.16667	3.87374
	84	435	198	734	30.4			84	163	2.66871	1.21472	4.50307
	90	532	279	789	22.0126			90	194	2.74227	1.43814	4.06701
Mean		497.4	238	878.4	24.8996		Mean		193	2.58268	1.23446	4.5156
SD		36.4395	26.6383	228.975	7.53256		SD		17.0646	0.104741	0.103567	0.860382
SEM		7.28791	5.32766	45.795	1.50651		SEM		3.41292	0.0209482	0.0207135	0.172076
p (T-test) compared to Control		0.0117832	0.0015675	0.39847	0.0697322		p (T-test) compared to Control		0.766688	0.0119923	0.00225294	0.189887
p (T-test) compared to Burn		0.00589913	0.0239932	0.0778931	0.366359		p (T-test) compared to Burn		0.447063	0.0025941	0.0198373	0.0511115

## Sheet: Biochemistry
Group	Rat #	ALT, U/L	AST, U/L	ALP, U/L	LDH, U/l	GGT, U/l	Creatinine, mkmol/l	Urea, mmol/l	7days
Control	2	54.4743	116.967	159.858	3441.11	5.12	53.1	14
	5	74.587	90.3898	246.012	3040.36	5.22	50.0025	10.6
	6	37.594	89.3124	191.73	1613.69	8.64	48.675	10
	7	48.3687	82.8476	152.388	3312.87	5.94	58.41	15.3
	9	82.4884	63.094	194.22	4440.31	7.12	54.4275	9.7
Mean		59.5025	88.5222	188.842	3169.67	6.408	52.923	11.92
SD		16.644	17.2744	33.0897	910.661	1.325	3.43444	2.28508
SEM		3.32881	3.45489	6.61794	182.132	0.264999	0.686888	0.457016
Acidic burn	15	37.594	73.1504	83.664	3638.81	11.34	69.915	3.1
	16	39.0306	70.2771	80.676	2960.21	13.32	38.4975	4.7
	17	55.9109	53.3968	94.122	2345.72	21.96	52.215	10.2
	18	64.5307	85.7208	121.014	2746.47	5.76	46.4625	12.8
	20	62.7349	97.2138	235.056	2912.12	7.56	53.5425	9
Mean		51.9602	75.9518	122.906	2920.67	11.988	52.1265	7.96
SD		11.5176	14.8073	57.8499	419.111	5.65739	10.3564	3.57133
SEM		2.30353	2.96146	11.57	83.8222	1.13148	2.07128	0.714266
p (T-test) compared to Control		0.477435	0.301287	0.0832154	0.632714	0.0910216	0.887534	0.0987088
Acidic burn+gel	25	68.4814	80.6926	78.186	1709.87	2.88	38.4975	18.4
	26	70.9954	82.4884	264.438	3441.11	6.48	37.17	14.4
	27	57.3476	85.0025	186.252	2693.04	7.56	34.515	17.3
	29	68.8405	89.6715	259.956	2201.45	6.3	48.2325	12
	30	65.8171	82.7266	200.762	2500.99	6.01	40.12	16.2
Mean		66.2964	84.1163	197.919	2509.29	5.846	39.707	15.66
SD		4.76737	3.09673	67.459	572.006	1.57289	4.64135	2.25708
SEM		0.953475	0.619345	13.4918	114.401	0.314578	0.928271	0.451416
p (T-test) compared to Control		0.455171	0.629122	0.815158	0.254298	0.599607	0.00180705	0.0482464
p (T-test) compared to Burn		0.0504572	0.311867	0.129851	0.2794	0.0698035	0.0600449	0.00654
Acidic burn+Ag 195	35	56.6292	81.4109	100.596	3307.52	16.74	38.94	10.2
	37	63.094	75.6645	69.72	780.127	10.98	33.63	9.6
	38	38.6715	67.4039	84.162	555.707	12.42	53.985	8.4
	39	36.8757	110.143	189.738	1656.43	18.54	34.515	6.4
	40	35.7982	85.0025	75.198	1570.88	10.44	41.563	12
Mean		46.2137	83.925	103.883	1574.13	13.824	40.5266	9.32
SD		11.3666	14.3949	44.1831	967.374	3.23279	7.32697	1.8659
SEM		2.27331	2.87898	8.83663	193.475	0.646558	1.46539	0.373181
p (T-test) compared to Control		0.223781	0.693345	0.0151582	0.0430511	0.00281729	0.0154911	0.115979
p (T-test) compared to Burn		0.497736	0.462205	0.615359	0.0339384	0.588508	0.104838	0.51868
Acidic burn+Ag 197	42	103.679	77.8194	174.3	897.68	8.64	40.8075	3.1
	45	100.805	74.9462	170.316	865.62	9.9	46.472	5.8
	46	64.5307	83.925	410.352	1127.44	14.4	29.6475	10.6
	47	78.6905	80.7843	247.953	954.875	10.1	34.671	5.4
	48	95.9368	76.9358	253.984	978.943	11.4	41.982	7.2
Mean		88.7284	78.8821	251.381	964.912	10.888	38.716	6.42
SD		14.8836	3.14512	86.9521	90.6566	1.96198	5.8957	2.47095
SEM		2.97672	0.629023	17.3904	18.1313	0.392397	1.17914	0.49419
p (T-test) compared to Control		0.0307529	0.304125	0.215686	0.00132427	0.00535286	0.00314623	0.0113839
p (T-test) compared to Burn		0.00449731	0.708733	0.0393	1.67841e-05	0.722846	0.0545114	0.498334
Alkali burn	55	41.9039	79.256	59.76	2377.78	7.2	59.7375	7.6
	56	79.9743	105.833	112.548	4616.64	15.84	36.7275	9
	57	45.1363	110.143	76.194	5183.03	4.32	91.155	16.3
	58	49.4461	83.2067	130.476	3916.66	4.68	79.2075	24.9
	59	61.2983	97.5729	87.15	4573.89	10.08	44.25	10.3
Mean		55.5518	95.2025	93.2256	4133.6	8.424	62.2155	13.62
SD		13.8673	12.166	25.3294	965.241	4.24495	20.5171	6.37225
SEM		2.77346	2.4332	5.06587	193.048	0.84899	4.10342	1.27445
p (T-test) compared to Control		0.724769	0.544805	0.00178078	0.184353	0.391061	0.397722	0.629024
Alkali burn+gel	65	77.8194	121.277	181.77	3510.57	17.1	30.5325	14.2
	66	83.5659	122.355	201.69	2912.12	18.18	39.3825	8
	67	81.0518	117.326	153.882	4296.04	17.9	28.32	13.4
	68	55.9109	82.4884	120.018	4215.89	12.96	24.3375	9.6
	69	75.7181	110.946	163.877	3740.1	16.28	29.981	10.9
Mean		74.8132	110.879	164.247	3734.94	16.484	30.5107	11.22
SD		9.82529	14.7473	27.4693	504.689	1.88261	4.93756	2.31206
SEM		1.96506	2.94946	5.49386	100.938	0.376522	0.987512	0.462411
p (T-test) compared to Control		0.151778	0.0845289	0.285788	0.309173	2.27161e-05	7.24594e-05	0.678074
p (T-test) compared to Burn		0.0531646	0.139648	0.00522536	0.485052	0.00842562	0.0169477	0.498993
Alkali burn+Ag195	75	68.1222	96.4955	261.948	3804.45	26.64	20.355	25.5
	76	74.9462	84.6433	136.452	5471.57	10.26	30.09	11.5
	77	61.6574	68.8405	178.284	4552.52	8.1	35.4	19.7
	78	67.763	107.629	200.196	5102.88	3.96	28.32	23.8
	79	68.8405	60.2208	183.264	6315.82	17.28	37.17	36.7
Mean		68.2659	83.5659	192.029	5049.45	13.248	30.267	23.44
SD		4.21667	17.3736	40.7674	846.368	7.96617	5.93412	8.20673
SEM		0.843334	3.47472	8.15349	169.274	1.59323	1.18682	1.64135
p (T-test) compared to Control		0.337229	0.696374	0.906366	0.0164586	0.128718	0.000167842	0.0268832
p (T-test) compared to Burn		0.11745	0.304441	0.00335717	0.191471	0.316328	0.0172889	0.0953899
Alkali burn+Ag197	85	65.9673	97.9321	153.384	4809	13.14	47.3475	16.2
	86	64.1715	90.3898	205.176	6620.39	8.46	48.675	22
	87	63.094	106.193	518.916	4990.67	8.1	53.1	5.5
	88	25.7419	51.6011	163.842	4659.39	18.36	66.375	7.3
	89	43.3405	70.9954	165.336	4990.67	11.88	48.675	10.3
Mean		52.463	83.4222	241.331	5214.02	11.988	52.8345	12.26
SD		15.6825	19.721	139.911	714.045	3.72839	7.04451	6.07506
SEM		3.13651	3.9442	27.9821	142.809	0.745678	1.4089	1.21501
p (T-test) compared to Control		0.555234	0.707381	0.486109	0.00769573	0.0224787	0.982535	0.91914
p (T-test) compared to Burn		0.775439	0.339018	0.0707542	0.109597	0.242622	0.412279	0.765254
Group	Rat #	ALT, U/L	AST, U/L	ALP, U/L	LDH, U/l	GGT, U/l	Creatinine, mkmol/l	Urea, mmol/l	14 days
	1	55.9109	69.487	346.11	5316.62	15.3	44.25	15.1
	3	64.8898	81.6983	176.292	1816.73	3.96	46.905	10.7
	4	41.5447	70.7081	166.83	1816.73	3.24	38.055	10.9
	8	49.4461	106.731	80.178	2965.55	3.42	27.435	10.9
	10	52.3194	100.626	220.614		12.6	43.8075	10.3
Mean		52.8222	85.8501	198.005	2978.91	7.704	40.0905	11.58
SD		7.66811	15.288	86.917	1428.84	5.17624	6.955	1.77358
SEM		1.53362	3.0576	17.3834	357.211	1.03525	1.391	0.354717
	11	30.7701	77.4243	134.46	2457.93	5.76	61.95	17.4
	12	34.7208	51.7806	79.182	2938.83	11.88	53.1	8.7
	13	25.7419	86.5828	277.386	5984.53	10.08	54.4275	3.2
	14	27.9221	72.8664	175.826	3052.99	9.86	56.81	8.6
	19	22.5095	69.487	227.586	1629.72	11.16	61.065	2.4
Mean		28.3329	71.6282	178.888	3212.8	9.748	57.4705	8.06
SD		4.18423	11.4654	69.2789	1473.71	2.12443	3.51522	5.35896
SEM		0.836845	2.29308	13.8558	294.742	0.424887	0.703043	1.07179
p (T-test) compared to Control		0.000506158	0.174954	0.739725	0.83853	0.485855	0.00210969	0.247611
	21	19.9954	84.1405	173.802	4605.95	8.28	53.5425	5.9
	22	45.8546	62.7708	251.988	1303.77	6.3	50.8875	15.8
	23	21.7912	94.5201	161.352	1047.29	3.06	55.3125	17.2
	24	32.9811	76.9474	190.846	1987.28	5.76	50.9812	9.9
	28	47.2912	80.4771	183.264	844.247	5.22	43.365	2.2
Mean		33.5827	79.7712	192.25	1957.71	5.724	50.8177	10.2
SD		11.5112	10.3354	31.4527	1379.16	1.68625	4.07927	5.70859
SEM		2.30224	2.06709	6.29054	275.831	0.337249	0.815853	1.14172
p (T-test) compared to Control		0.0238507	0.528512	0.903984	0.369986	0.487714	0.0287677	0.656584
p (T-test) compared to Burn		0.416247	0.322222	0.73447	0.248832	0.0179475	0.0386565	0.599545
	31	41.1856	55.444	151.89	828.217	4.86	76.11	17
	32	26.1011	85.3617	199.698	1255.68	5.04	66.375	19.7
	33	29.6926	79.8666	269.418	635.857	5.58	68.5875	18.5
	34	28.9765	83.8765	198.735	1098.67	8.35	68.0111	17.05
	36	20.3546	109.174	179.778	1432.01	16.74	58.8525	13.3
Mean		29.2621	82.7445	199.904	1050.09	8.114	67.5872	17.11
SD		6.80841	17.0893	38.8433	286.814	4.49272	5.50605	2.15277
SEM		1.36168	3.41787	7.76866	57.3628	0.898544	1.10121	0.430553
p (T-test) compared to Control		0.00176676	0.793339	0.969155	0.035556	0.90772	0.000259576	0.0041467
p (T-test) compared to Burn		0.821951	0.31148	0.611034	0.0204798	0.529266	0.0147245	0.0139288
	41	34.3616	80.4771	230.076	961.8	5.58	43.8075	7.2
	43	38.3123	85.9722	51.294	1009.89	4.68	51.33	11
	44	41.5447	58.4968	40.338	865.62	5.04	43.8075	22
	49	35.6789	71.9877	112.727	1001.87	5.12	46.871	15.87
	50	25.3827	55.444	134.958	993.86	3.6	50.8875	27.7
Mean		35.0561	70.4756	113.879	966.608	4.804	47.3407	16.754
SD		5.42493	11.9323	68.224	53.0681	0.666741	3.27664	7.38247
SEM		1.08499	2.38646	13.6448	10.6136	0.133348	0.655328	1.47649
		0.00536653	0.151503	0.166328	0.0274994	0.29871	0.0960063	0.210031
		0.0853065	0.892649	0.217928	0.0159083	0.00216551	0.0029322	0.093094
	51	53.756	87.8039	95.118	4221.23	11.52	37.17	10.6
	52	41.5447	52.3912	57.768	1474.76	6.84	34.515	18.5
	53	51.6011	109.174	310.752	2276.26	7.56	29.6475	17.5
	54	55.5518	64.6025	108.564	1784.67	7.2	40.71	10.9
	60	49.087	40.7905	73.206	NA	6.12	41.1525	10.4
Mean		50.3081	70.9523	129.082	2439.23	7.848	36.639	13.58
SD		4.88557	24.6553	92.5055	1067.79	1.89676	4.25721	3.62624
SEM		0.977113	4.93106	18.5011	266.949	0.379352	0.851442	0.725248
p (T-test) compared to Control		0.595362	0.334441	0.309123	0.619041	0.959617	0.421858	0.350754
	61	48.7278	67.0447	115.536	2489.99	4.32	55.755	6.9
	62	31.4884	95.1307	112.05	3783.08	6.84	27.8775	7
	63	37.9532	51.1701	49.8	683.947	5.4	31.4175	12.8
	64	38.6715	101.847	46.314	3152.57	10.8	46.02	19.1
	70	41.1856	98.1835	175.296	5663.93	8.64	26.55	8.4
Mean		39.6053	82.6752	99.7992	3154.7	7.2	37.524	10.84
SD		5.57142	20.0004	47.8708	1627.12	2.31074	11.4484	4.65386
SEM		1.11428	4.00008	9.57417	325.424	0.462148	2.28967	0.930772
p (T-test) compared to Control		0.0236005	0.807217	0.0831265	0.885097	0.863283	0.71156	0.773909
p (T-test) compared to Burn		0.020239	0.481309	0.589336	0.525011	0.676093	0.888364	0.380144
	71	42.9813	46.2856	150.396	3580.03	5.76	62.835	10.4
	72	37.2349	43.8433	254.478	1496.13	5.508	61.5075	14.1
	73	36.8757	76.2032	136.452	3312.87	6.84	65.0475	20.7
	74	41.1856	72.5398	124.5	2484.65	19.44	68.5875	6
	80	36.5166	82.9194	132.966	NA	9.72	56.64	5.6
Mean		38.9588	64.3583	159.758	2718.42	9.4536	62.9235	11.36
SD		2.62355	16.1198	48.0908	813.077	5.2123	3.9519	5.61377
SEM		0.524711	3.22396	9.61816	203.269	1.04246	0.79038	1.12275
p (T-test) compared to Control		0.00907243	0.089063	0.463397	0.79295	0.646563	0.000449837	0.942259
p (T-test) compared to Burn		0.00347016	0.666241	0.572451	0.730964	0.578562	1.77912e-05	0.525142
	81	30.4109	98.1835	167.826	3355.61	6.3	45.135	13.8
	82	37.2349	106.731	117.528	1944.97	5.4	45.5775	17.1
	83	57.3476	104.9	184.26	1880.85	4.32	31.86	6.3
	84	40.0911	100.735	128.74	2076.99	6.04	45.98	10.01
	90	32.925	96.3518	56.274	1496.13	9.72	55.755	4.7
Mean		39.6019	101.38	130.926	2150.91	6.356	44.8615	10.382
SD		9.48478	3.9228	44.6393	632.59	1.81542	7.60981	4.60218
SEM		1.89696	0.78456	8.92786	126.518	0.363084	1.52196	0.920437
p (T-test) compared to Control		0.0620271	0.0846137	0.206995	0.339841	0.63628	0.38174	0.640138
p (T-test) compared to Burn		0.079653	0.040716	0.972237	0.670493	0.288631	0.0960208	0.30678
